# Supplementary material for: The Importance of Non-Native Prey, the Zebra Mussel Dreissena polymorpha, for the Declining Greater Scaup Aythya marila: A Case Study at a Key European Staging and Wintering Site
Source: PubMed Central journal article supplement (PMC4692530; doi:10.1371/journal.pone.0145496), 2015-12-28
Supplement: pone.0145496.s004.pdf [file pone.0145496.s004.pdf]

| No (1) | Year (2) | Depth (3) | Biomass (4) | lat (5)     | long (6)    |
|--------|----------|-----------|-------------|-------------|-------------|
| 1      | 2003     | 4.9       | 0           | 53.74330000 | 14.50470000 |
| 2      | 2003     | 5.3       | 0           | 53.73580000 | 14.47840000 |
| 3      | 2003     | 5.3       | 0           | 53.77280000 | 14.52340000 |
| 4      | 2003     | 5.1       | 0           | 53.70830000 | 14.39400000 |
| 5      | 2003     | 4.5       | 0           | 53.70270000 | 14.38370000 |
| 6      | 2003     | 3.9       | 11.5603     | 53.70100000 | 14.38170000 |
| 7      | 2003     | 3.5       | 516.768     | 53.69920000 | 14.37750000 |
| 8      | 2003     | 1.7       | 0           | 53.69780000 | 14.37630000 |
| 9      | 2003     | 1.5       | 0           | 53.72170000 | 14.34200000 |
| 10     | 2003     | 3.9       | 0           | 53.72000000 | 14.34220000 |
| 11     | 2003     | 1.8       | 0           | 53.72000000 | 14.34220000 |
| 12     | 2003     | 2.7       | 89.6301     | 53.72280000 | 14.34330000 |
| 13     | 2003     | 3.2       | 223.45      | 53.72470000 | 14.34550000 |
| 14     | 2003     | 3.6       | 69.4285     | 53.72820000 | 14.34900000 |
| 15     | 2003     | 4         | 4.96103     | 53.73070000 | 14.35130000 |
| 16     | 2003     | 4.5       | 0           | 53.73120000 | 14.35300000 |
| 17     | 2003     | 5         | 0           | 53.73270000 | 14.35420000 |
| 18     | 2003     | 1.7       | 16.5297     | 53.83770000 | 14.37500000 |
| 19     | 2003     | 1.9       | 12.0967     | 53.83700000 | 14.36930000 |
| 20     | 2003     | 1.7       | 4.11577     | 53.83580000 | 14.36200000 |
| 21     | 2003     | 1.9       | 54.2886     | 53.83380000 | 14.35570000 |
| 22     | 2003     | 2.1       | 0           | 53.83120000 | 14.35080000 |
| 23     | 2003     | 1.5       | 0           | 53.82670000 | 14.34980000 |
| 24     | 2003     | 1.1       | 10.3535     | 53.82470000 | 14.34270000 |
| 25     | 2003     | 1         | 15.2584     | 53.82470000 | 14.34270000 |
| 26     | 2003     | 1.5       | 0           | 53.81500000 | 14.34430000 |
| 27     | 2003     | 2.3       | 0           | 53.81300000 | 14.34780000 |
| 28     | 2003     | 2.9       | 1205.07     | 53.81200000 | 14.34920000 |
| 29     | 2003     | 3.5       | 3372.8      | 53.80950000 | 14.35350000 |
| 30     | 2003     | 3.9       | 63.6239     | 53.80580000 | 14.36030000 |
| 31     | 2003     | 2.4       | 0           | 53.81250000 | 14.37320000 |
| 32     | 2003     | 3         | 0           | 53.81930000 | 14.38600000 |
| 33     | 2003     | 1.5       | 7.06059     | 53.83500000 | 14.41050000 |
| 34     | 2003     | 2         | 6.95896     | 53.84130000 | 14.42350000 |
| 35     | 2003     | 1.9       | 0.0302691   | 53.84770000 | 14.42630000 |
| 36     | 2003     | 2.5       | 32.3764     | 53.85600000 | 14.44350000 |
| 37     | 2003     | 3         | 232.377     | 53.85580000 | 14.44600000 |
| 38     | 2003     | 3.5       | 10.0024     | 53.85770000 | 14.44670000 |
| 39     | 2003     | 4.5       | 0           | 53.80470000 | 14.35380000 |
| 40     | 2003     | 5         | 0           | 53.80320000 | 14.35980000 |
| 41     | 2003     | 2         | 0           | 53.81880000 | 14.46780000 |
| 42     | 2003     | 2.5       | 3.139       | 53.81970000 | 14.45570000 |
| 43     | 2003     | 5         | 870.178     | 53.82130000 | 14.49130000 |
| 44     | 2003     | 4.5       | 153.345     | 53.82220000 | 14.48850000 |
| 45     | 2003     | 4         | 40.0044     | 53.82300000 | 14.48730000 |
| 46     | 2003     | 3.5       | 7.70931     | 53.82280000 | 14.48750000 |
| 47     | 2003     | 3         | 0           | 53.82550000 | 14.48150000 |
| 48     | 2003     | 2.5       | 151.838     | 53.84080000 | 14.45170000 |
| 49     | 2003     | 5         | 0           | 53.69550000 | 14.42180000 |
| 50     | 2003     | 4.5       | 0           | 53.68850000 | 14.41530000 |
| 51     | 2003     | 4         | 0           | 53.68320000 | 14.41200000 |
| 52     | 2003     | 3.5       | 0           | 53.68220000 | 14.41330000 |

|     |      |     |          |             |             |
|-----|------|-----|----------|-------------|-------------|
| 53  | 2003 | 3   | 0        | 53.68120000 | 14.41450000 |
| 54  | 2003 | 2.5 | 87.2505  | 53.68100000 | 14.41470000 |
| 55  | 2003 | 2   | 0        | 53.68070000 | 14.41530000 |
| 56  | 2003 | 1.3 | 0        | 53.68120000 | 14.41620000 |
| 57  | 2003 | 1.7 | 0        | 53.67350000 | 14.49070000 |
| 58  | 2003 | 2.4 | 111.645  | 53.67700000 | 14.49220000 |
| 59  | 2003 | 3   | 0        | 53.67930000 | 14.49950000 |
| 60  | 2003 | 3.5 | 0        | 53.68080000 | 14.49280000 |
| 61  | 2003 | 4   | 0        | 53.68020000 | 14.49350000 |
| 62  | 2003 | 4.5 | 0        | 53.68050000 | 14.49380000 |
| 63  | 2003 | 5   | 0        | 53.68270000 | 14.49400000 |
| 64  | 2003 | 5   | 0        | 53.80430000 | 14.35520000 |
| 65  | 2003 | 4.5 | 86.7835  | 53.80820000 | 14.35130000 |
| 66  | 2003 | 1.5 | 16.943   | 53.82470000 | 14.34270000 |
| 67  | 2003 | 3.5 | 2037     | 53.79950000 | 14.41320000 |
| 68  | 2003 | 5   | 0        | 53.85400000 | 14.46820000 |
| 69  | 2003 | 4.8 | 0        | 53.85870000 | 14.47200000 |
| 70  | 2003 | 4.5 | 0        | 53.85900000 | 14.47280000 |
| 71  | 2003 | 3.5 | 10.8022  | 53.85930000 | 14.47280000 |
| 72  | 2003 | 2.5 | 1.56373  | 53.85930000 | 14.47270000 |
| 73  | 2003 | 2   | 0.224219 | 53.85970000 | 14.47320000 |
| 74  | 2003 | 2   | 2.68899  | 53.86170000 | 14.44170000 |
| 75  | 2003 | 4.3 | 0        | 53.86170000 | 14.44120000 |
| 76  | 2003 | 2   | 733.977  | 53.86300000 | 14.41600000 |
| 77  | 2003 | 1.5 | 428.761  | 53.86300000 | 14.41600000 |
| 78  | 2003 | 0.7 | 80.8324  | 53.86300000 | 14.41600000 |
| 79  | 2003 | 2.5 | 0        | 53.81670000 | 14.36880000 |
| 80  | 2003 | 3.5 | 903.896  | 53.80980000 | 14.35480000 |
| 81  | 2003 | 3   | 25.1009  | 53.82250000 | 14.38470000 |
| 82  | 2003 | 1   | 210.906  | 53.84830000 | 14.41780000 |
| 83  | 2003 | 1.5 | 0        | 53.84830000 | 14.41780000 |
| 84  | 2003 | 2   | 0        | 53.86320000 | 14.41870000 |
| 85  | 2003 | 3   | 7.53522  | 53.86350000 | 14.41830000 |
| 86  | 2003 | 5   | 0        | 53.83520000 | 14.23850000 |
| 87  | 2003 | 4.5 | 0        | 53.84250000 | 14.23420000 |
| 88  | 2003 | 4   | 117.766  | 53.84720000 | 14.23200000 |
| 89  | 2003 | 3.5 | 0        | 53.85150000 | 14.22900000 |
| 90  | 2003 | 3   | 0        | 53.85570000 | 14.22620000 |
| 91  | 2003 | 2.5 | 0        | 53.85720000 | 14.22470000 |
| 92  | 2003 | 2   | 0        | 53.86520000 | 14.22200000 |
| 93  | 2003 | 1.5 | 0        | 53.86150000 | 14.21980000 |
| 94  | 2003 | 5   | 0        | 53.81500000 | 14.32670000 |
| 95  | 2003 | 4.5 | 0        | 53.81630000 | 14.33050000 |
| 96  | 2003 | 4   | 0        | 53.82570000 | 14.33280000 |
| 97  | 2003 | 3.5 | 0        | 53.81870000 | 14.26820000 |
| 98  | 2003 | 3   | 0        | 53.81930000 | 14.26950000 |
| 99  | 2003 | 2.5 | 0        | 53.81950000 | 14.26980000 |
| 100 | 2003 | 1.5 | 0        | 53.81970000 | 14.27000000 |
| 101 | 2003 | 4.5 | 422.718  | 53.69220000 | 14.52080000 |
| 102 | 2003 | 4   | 233.859  | 53.69320000 | 14.52330000 |
| 103 | 2003 | 3.5 | 991.44   | 53.69320000 | 14.52480000 |
| 104 | 2003 | 3   | 517.16   | 53.69330000 | 14.53220000 |
| 105 | 2003 | 2.5 | 30.8703  | 53.69320000 | 14.52670000 |

|     |      |     |         |             |             |
|-----|------|-----|---------|-------------|-------------|
| 106 | 2003 | 2   | 19.0328 | 53.69320000 | 14.52720000 |
| 107 | 2003 | 1.5 | 0       | 53.69320000 | 14.52770000 |
| 108 | 2003 | 5   | 0       | 53.72650000 | 14.51730000 |
| 109 | 2003 | 4.5 | 4.05441 | 53.72600000 | 14.51930000 |
| 110 | 2003 | 4   | 695.037 | 53.72670000 | 14.52020000 |
| 111 | 2003 | 3.5 | 70.0039 | 53.72700000 | 14.52070000 |
| 112 | 2003 | 3   | 17.9669 | 53.72770000 | 14.52870000 |
| 113 | 2003 | 2.5 | 0       | 53.72830000 | 14.53450000 |
| 114 | 2003 | 2   | 76.9789 | 53.72880000 | 14.53520000 |
| 115 | 2003 | 1.5 | 0       | 53.72930000 | 14.53550000 |
| 116 | 2003 | 3   | 0       | 53.72980000 | 14.53230000 |
| 117 | 2003 | 5   | 0       | 53.75000000 | 14.51770000 |
| 118 | 2003 | 4.5 | 2221.96 | 53.74980000 | 14.52700000 |
| 119 | 2003 | 4   | 1411.32 | 53.75020000 | 14.53300000 |
| 120 | 2003 | 3.5 | 125.547 | 53.75050000 | 14.53650000 |
| 121 | 2003 | 3   | 22.3808 | 53.74970000 | 14.53780000 |
| 122 | 2003 | 2.5 | 29.4046 | 53.74980000 | 14.53850000 |
| 123 | 2003 | 2   | 66.1026 | 53.83350000 | 14.55570000 |
| 124 | 2003 | 1.4 | 0       | 53.83370000 | 14.53930000 |
| 125 | 2003 | 5   | 77.3028 | 53.78070000 | 14.53700000 |
| 126 | 2003 | 4.5 | 1703.1  | 53.78080000 | 14.53780000 |
| 127 | 2003 | 4   | 5.60842 | 53.78100000 | 14.53870000 |
| 127 | 2003 | 3.5 | 7.6006  | 53.78170000 | 14.53900000 |
| 128 | 2003 | 3   | 20.5281 | 53.78220000 | 14.54050000 |
| 129 | 2003 | 2.5 | 6.63099 | 53.78230000 | 14.54830000 |
| 130 | 2003 | 2   | 0       | 53.78270000 | 14.54980000 |
| 131 | 2003 | 1.5 | 0       | 53.78280000 | 14.54950000 |
| 132 | 2003 | 5   | 809.579 | 53.82480000 | 14.52330000 |
| 133 | 2003 | 4.5 | 962.379 | 53.82450000 | 14.52350000 |
| 134 | 2003 | 4   | 129.54  | 53.82420000 | 14.52380000 |
| 135 | 2003 | 3.5 | 8.45542 | 53.82480000 | 14.52450000 |
| 136 | 2003 | 3   | 6.89266 | 53.82520000 | 14.53180000 |
| 137 | 2003 | 2.5 | 0       | 53.82480000 | 14.53280000 |
| 138 | 2003 | 2   | 7.5427  | 53.82470000 | 14.52720000 |
| 139 | 2003 | 1.5 | 0       | 53.82470000 | 14.52820000 |
| 140 | 2003 | 5.4 | 0       | 53.82520000 | 14.51980000 |
| 141 | 2003 | 5.5 | 169.624 | 53.76450000 | 14.31950000 |
| 142 | 2003 | 5   | 257.057 | 53.76250000 | 14.31830000 |
| 143 | 2003 | 4.5 | 1140.57 | 53.75830000 | 14.31420000 |
| 144 | 2003 | 4   | 3057.04 | 53.75700000 | 14.31250000 |
| 145 | 2003 | 3.5 | 0       | 53.82320000 | 14.31220000 |
| 146 | 2003 | 2.5 | 0       | 53.82220000 | 14.31250000 |
| 147 | 2003 | 2   | 0       | 53.82220000 | 14.31180000 |
| 148 | 2003 | 1.5 | 0       | 53.74700000 | 14.30880000 |
| 149 | 2003 | 1.9 | 0       | 53.75120000 | 14.30850000 |
| 150 | 2003 | 5   | 0       | 53.79720000 | 14.32300000 |
| 151 | 2003 | 4.5 | 229.964 | 53.79770000 | 14.32230000 |
| 152 | 2003 | 4   | 0       | 53.79830000 | 14.32270000 |
| 153 | 2003 | 3.3 | 312.781 | 53.79830000 | 14.32220000 |
| 154 | 2003 | 2   | 0       | 53.79900000 | 14.32150000 |
| 155 | 2003 | 3.5 | 1.64859 | 53.76350000 | 14.27650000 |
| 156 | 2003 | 3.8 | 3614.02 | 53.76080000 | 14.28000000 |
| 157 | 2003 | 2.3 | 7.05918 | 53.75830000 | 14.28330000 |

|     |      |     |         |             |             |
|-----|------|-----|---------|-------------|-------------|
| 158 | 2003 | 2   | 0       | 53.75470000 | 14.27350000 |
| 159 | 2003 | 2.3 | 0       | 53.80220000 | 14.30600000 |
| 160 | 2003 | 1.6 | 0       | 53.80620000 | 14.29270000 |
| 161 | 2003 | 4.5 | 1665.86 | 53.79800000 | 14.40720000 |
| 162 | 2003 | 4   | 1930.42 | 53.79870000 | 14.40700000 |
| 163 | 2003 | 5.5 | 0       | 53.78020000 | 14.27820000 |
| 164 | 2003 | 5   | 0       | 53.77630000 | 14.28120000 |
| 165 | 2003 | 5.5 | 137.173 | 53.78870000 | 14.30950000 |
| 166 | 2003 | 6   | 0       | 53.78720000 | 14.31000000 |
| 167 | 2003 | 1.9 | 0       | 53.80210200 | 14.30078900 |
| 168 | 2003 | 1   | 12.98   | 53.82703100 | 14.27151800 |
| 169 | 2003 | 0.9 | 591.33  | 53.86272900 | 14.44273400 |
| 170 | 2003 | 0.4 | 36.57   | 53.86296200 | 14.44498800 |
| 171 | 2003 | 1   | 0       | 53.86199200 | 14.43964100 |
| 172 | 2003 | 0.5 | 22.52   | 53.86325500 | 14.44818100 |
| 173 | 2003 | 0.8 | 0       | 53.84869700 | 14.57335600 |
| 174 | 2003 | 0.7 | 0       | 53.85573730 | 14.54456800 |
| 175 | 2003 | 0.7 | 330.41  | 53.85657100 | 14.54551700 |
| 176 | 2003 | 4   | 0       | 53.67483400 | 14.52308800 |
| 177 | 2003 | 3.8 | 0       | 53.67419700 | 14.52361000 |
| 178 | 2003 | 1   | 990.53  | 53.69391800 | 14.54197900 |
| 179 | 2003 | 0.5 | 96.31   | 53.69392200 | 14.54293900 |
| 180 | 2003 | 1   | 0       | 53.69394000 | 14.54050300 |
| 181 | 2003 | 0.5 | 0       | 53.69392500 | 14.54387500 |
| 182 | 2003 | 1   | 267.19  | 53.72281300 | 14.54689000 |
| 183 | 2003 | 0.5 | 197.75  | 53.72273200 | 14.54745300 |
| 184 | 2003 | 1   | 376.6   | 53.72278200 | 14.54618700 |
| 185 | 2003 | 0.5 | 0       | 53.72262300 | 14.54811000 |
| 186 | 2004 | 2   | 92.7339 | 53.88233333 | 14.38366667 |
| 187 | 2004 | 1.6 | 5.11291 | 53.88316667 | 14.37850000 |
| 188 | 2004 | 3   | 19.4915 | 53.88766667 | 14.36383333 |
| 189 | 2004 | 1.5 | 0       | 53.88700000 | 14.36283333 |
| 190 | 2004 | 0.5 | 20.332  | 53.88700000 | 14.36283333 |
| 191 | 2004 | 5.3 | 9.46002 | 53.86816667 | 14.41600000 |
| 192 | 2004 | 1.5 | 12.1271 | 53.86816667 | 14.41600000 |
| 193 | 2004 | 2.2 | 247.26  | 53.87600000 | 14.39316667 |
| 194 | 2004 | 1.5 | 0       | 53.87683333 | 14.38016667 |
| 195 | 2004 | 1.5 | 0       | 53.87550000 | 14.37033333 |
| 196 | 2004 | 2   | 0       | 53.89216667 | 14.39383333 |
| 197 | 2004 | 1.5 | 0       | 53.89133333 | 14.40966667 |
| 198 | 2004 | 1.6 | 0       | 53.88650000 | 14.41816667 |
| 199 | 2004 | 1.8 | 0       | 53.87883333 | 14.42350000 |
| 200 | 2004 | 1.7 | 3.70486 | 53.87383333 | 14.42350000 |
| 201 | 2004 | 1.6 | 3.75858 | 53.86716667 | 14.48666667 |
| 202 | 2004 | 2.5 | 0       | 53.87383333 | 14.34566667 |
| 203 | 2004 | 1.5 | 0       | 53.87383333 | 14.34566667 |
| 204 | 2004 | 0.5 | 0       | 53.87383333 | 14.34566667 |
| 205 | 2004 | 3.5 | 0       | 53.87383333 | 14.34566667 |
| 206 | 2004 | 5.5 | 0       | 53.87383333 | 14.34566667 |
| 207 | 2004 | 3   | 2.76513 | 53.88433333 | 14.37266667 |
| 208 | 2004 | 1   | 654.9   | 53.88433333 | 14.37266667 |
| 209 | 2004 | 1.9 | 0       | 53.89366667 | 14.43466667 |
| 210 | 2004 | 1.4 | 0       | 53.89716667 | 14.43616667 |

|     |      |     |          |             |             |
|-----|------|-----|----------|-------------|-------------|
| 211 | 2004 | 1   | 0        | 53.89850000 | 14.43050000 |
| 212 | 2004 | 1.5 | 0        | 53.89100000 | 14.42650000 |
| 213 | 2004 | 1   | 0        | 53.89100000 | 14.42650000 |
| 214 | 2004 | 1.5 | 14.2966  | 53.89033333 | 14.43033333 |
| 215 | 2004 | 5.5 | 0        | 53.85800000 | 14.36016667 |
| 216 | 2004 | 10  | 0        | 53.86883333 | 14.35050000 |
| 217 | 2004 | 6   | 0        | 53.85816667 | 14.28683333 |
| 218 | 2004 | 1.5 | 0        | 53.86033333 | 14.29350000 |
| 219 | 2004 | 4   | 0        | 53.86033333 | 14.29350000 |
| 220 | 2004 | 4.5 | 0        | 53.85816667 | 14.29566667 |
| 221 | 2004 | 2   | 0        | 53.85616667 | 14.29766667 |
| 222 | 2004 | 6.5 | 0        | 53.87266667 | 14.32283333 |
| 223 | 2004 | 10  | 3.24871  | 53.87216667 | 14.34500000 |
| 224 | 2004 | 7.9 | 0        | 53.87116667 | 14.34466667 |
| 225 | 2004 | 2.8 | 0        | 53.86950000 | 14.34433333 |
| 226 | 2004 | 2   | 0        | 53.86866667 | 14.34383333 |
| 227 | 2004 | 1   | 16.3948  | 53.86866667 | 14.34383333 |
| 228 | 2004 | 2   | 0.775638 | 53.86133333 | 14.39650000 |
| 229 | 2004 | 5.6 | 4.72366  | 53.86083333 | 14.39716667 |
| 230 | 2004 | 4   | 5.19819  | 53.86000000 | 14.48100000 |
| 231 | 2004 | 2   | 6.14808  | 53.86000000 | 14.48100000 |
| 232 | 2004 | 1.4 | 0        | 53.87383333 | 14.40633333 |
| 233 | 2004 | 2.2 | 61.4511  | 53.87516667 | 14.40400000 |
| 234 | 2004 | 2.3 | 92.0704  | 53.87600000 | 14.38966667 |
| 235 | 2004 | 1.8 | 0.903181 | 53.87566667 | 14.38333333 |
| 236 | 2004 | 2.1 | 656.779  | 53.88000000 | 14.38300000 |
| 237 | 2004 | 3.7 | 0        | 53.74616667 | 14.27366667 |
| 238 | 2004 | 1.7 | 0        | 53.73716667 | 14.27533333 |
| 239 | 2004 | 1.9 | 0        | 53.73650000 | 14.28166667 |
| 240 | 2004 | 2.7 | 0        | 53.73833333 | 14.28500000 |
| 241 | 2004 | 1.7 | 45.8453  | 53.74066667 | 14.28583333 |
| 242 | 2004 | 1.2 | 463.285  | 53.74066667 | 14.28583333 |
| 243 | 2004 | 0.6 | 28.3301  | 53.74066667 | 14.28583333 |
| 244 | 2004 | 1.5 | 0        | 53.74066667 | 14.28583333 |
| 245 | 2004 | 1.8 | 0        | 53.73683333 | 14.29900000 |
| 246 | 2004 | 1.5 | 0        | 53.73683333 | 14.29900000 |
| 247 | 2004 | 1   | 168.899  | 53.73683333 | 14.29900000 |
| 248 | 2004 | 1.4 | 0        | 53.73716667 | 14.30216667 |
| 249 | 2004 | 2.1 | 0        | 53.73350000 | 14.29233333 |
| 250 | 2004 | 2   | 0        | 53.72166667 | 14.27950000 |
| 251 | 2004 | 1.9 | 0        | 53.72216667 | 14.28116667 |
| 252 | 2004 | 0.5 | 17.071   | 53.72216667 | 14.28116667 |
| 253 | 2004 | 0.7 | 0        | 53.72216667 | 14.28116667 |
| 254 | 2004 | 1.3 | 0        | 53.72216667 | 14.28116667 |
| 255 | 2004 | 4.1 | 0        | 53.82983333 | 14.61500000 |
| 256 | 2004 | 2.5 | 0        | 53.83433333 | 14.61850000 |
| 257 | 2004 | 4.5 | 119.709  | 53.84183333 | 14.61933333 |
| 258 | 2004 | 2.5 | 76.022   | 53.85600000 | 14.62533333 |
| 259 | 2004 | 3.2 | 1190.01  | 53.85716667 | 14.62650000 |
| 260 | 2004 | 2.2 | 620.238  | 53.85766667 | 14.62833333 |
| 261 | 2004 | 2   | 841.194  | 53.85816667 | 14.62866667 |
| 262 | 2004 | 1   | 0        | 53.85816667 | 14.62866667 |
| 263 | 2004 | 4.2 | 0        | 53.90116667 | 14.65633333 |

|     |      |     |          |             |             |
|-----|------|-----|----------|-------------|-------------|
| 264 | 2004 | 3   | 0        | 53.90183333 | 14.65350000 |
| 265 | 2004 | 1.9 | 223.362  | 53.90316667 | 14.65100000 |
| 267 | 2004 | 1.7 | 875.524  | 53.90400000 | 14.65166667 |
| 268 | 2004 | 1   | 28.5363  | 53.90400000 | 14.65166667 |
| 269 | 2004 | 1.2 | 0        | 53.90400000 | 14.65166667 |
| 270 | 2004 | 0.7 | 0        | 53.90400000 | 14.65166667 |
| 271 | 2004 | 2.8 | 9.66992  | 53.91433333 | 14.67533333 |
| 272 | 2004 | 2.2 | 0        | 53.93416667 | 14.70200000 |
| 273 | 2004 | 2.5 | 0        | 53.94983333 | 14.70883333 |
| 274 | 2004 | 1.8 | 1098.66  | 53.94966667 | 14.71200000 |
| 275 | 2004 | 1.5 | 973.305  | 53.94966667 | 14.71200000 |
| 276 | 2004 | 1   | 19.2371  | 53.94966667 | 14.71200000 |
| 277 | 2004 | 2.2 | 0        | 53.94216667 | 14.74583333 |
| 278 | 2004 | 2.1 | 0        | 53.94566667 | 14.73216667 |
| 279 | 2004 | 1.9 | 3462.57  | 53.94850000 | 14.72383333 |
| 280 | 2004 | 2.3 | 0        | 53.94400000 | 14.71516667 |
| 281 | 2004 | 2.4 | 17.6248  | 53.95783333 | 14.69966667 |
| 282 | 2004 | 2.4 | 0        | 53.95900000 | 14.70266667 |
| 283 | 2004 | 1.5 | 27.0155  | 53.95916667 | 14.70450000 |
| 284 | 2004 | 3.2 | 0        | 53.98483333 | 14.75200000 |
| 285 | 2004 | 3.1 | 0        | 54.00133333 | 14.75183333 |
| 286 | 2004 | 3.8 | 0        | 54.00583333 | 14.76816667 |
| 287 | 2004 | 1.5 | 0        | 54.00600000 | 14.76966667 |
| 288 | 2004 | 5   | 0.067258 | 54.00766667 | 14.77133333 |
| 289 | 2004 | 1.5 | 0        | 54.00766667 | 14.77133333 |
| 290 | 2004 | 1   | 419.21   | 54.00766667 | 14.77133333 |
| 291 | 2004 | 1   | 51.6554  | 54.00766667 | 14.77133333 |
| 292 | 2004 | 1   | 1054.36  | 54.00766667 | 14.77133333 |
| 293 | 2004 | 1.5 | 0        | 54.01316667 | 14.77516667 |
| 294 | 2004 | 2.4 | 0        | 54.01200000 | 14.79450000 |
| 295 | 2004 | 1.6 | 0        | 54.00933333 | 14.79850000 |
| 296 | 2004 | 2.6 | 0        | 54.01966667 | 14.79300000 |
| 297 | 2004 | 2.1 | 0        | 54.03083333 | 14.78916667 |
| 298 | 2004 | 4.1 | 0        | 54.02366667 | 14.76816667 |
| 299 | 2004 | 2   | 0        | 54.02416667 | 14.76666667 |
| 300 | 2004 | 1.5 | 0        | 54.02416667 | 14.76666667 |
| 301 | 2004 | 3   | 0        | 53.99866667 | 14.72500000 |
| 302 | 2004 | 1.5 | 21.8455  | 53.99866667 | 14.72500000 |
| 303 | 2004 | 1.5 | 0        | 53.98150000 | 14.72266667 |
| 304 | 2004 | 1   | 51.6554  | 53.98150000 | 14.72266667 |
| 305 | 2004 | 1   | 1880.6   | 53.98150000 | 14.72266667 |
| 306 | 2004 | 1   | 0        | 53.98150000 | 14.72266667 |
| 307 | 2004 | 2   | 3928.35  | 53.98283333 | 14.70083333 |
| 308 | 2004 | 3.2 | 0        | 53.88683333 | 14.64133333 |
| 309 | 2004 | 2.5 | 0        | 53.88766667 | 14.63816667 |
| 310 | 2004 | 4.1 | 399.996  | 53.57616667 | 14.58783333 |
| 311 | 2004 | 3   | 29.514   | 53.57133333 | 14.58650000 |
| 312 | 2004 | 10  | 0        | 53.56800000 | 14.58966667 |
| 313 | 2004 | 2   | 0        | 53.55416667 | 14.59783333 |
| 314 | 2004 | 4   | 5.15052  | 53.55900000 | 14.60216667 |
| 315 | 2004 | 3   | 0        | 53.57200000 | 14.59416667 |
| 316 | 2004 | 4.1 | 386.365  | 53.60150000 | 14.59283333 |
| 317 | 2004 | 2.7 | 352.409  | 53.60233333 | 14.59616667 |

|     |      |     |         |             |             |
|-----|------|-----|---------|-------------|-------------|
| 318 | 2004 | 4   | 74.3316 | 53.60600000 | 14.58600000 |
| 319 | 2004 | 2.7 | 309.202 | 53.60650000 | 14.58200000 |
| 320 | 2004 | 2.5 | 17.1808 | 53.60566667 | 14.57350000 |
| 321 | 2004 | 2.1 | 1120.68 | 53.61916667 | 14.57300000 |
| 322 | 2004 | 3.6 | 0       | 53.63250000 | 14.58083333 |
| 323 | 2004 | 3.7 | 0       | 53.64150000 | 14.58850000 |
| 324 | 2004 | 3   | 660.609 | 53.64583333 | 14.60400000 |
| 325 | 2004 | 2.8 | 83.9566 | 53.64750000 | 14.60900000 |
| 326 | 2004 | 2   | 0       | 53.65000000 | 14.61000000 |
| 327 | 2004 | 1.2 | 52.3933 | 53.64750000 | 14.60900000 |
| 328 | 2004 | 1.5 | 415.793 | 53.64750000 | 14.60900000 |
| 329 | 2004 | 3   | 1263.57 | 53.64250000 | 14.58850000 |
| 330 | 2004 | 5.1 | 0       | 53.65133333 | 14.57466667 |
| 331 | 2004 | 4   | 0       | 53.65500000 | 14.55933333 |
| 332 | 2004 | 2.5 | 21.5935 | 53.66116667 | 14.56433333 |
| 333 | 2004 | 2.7 | 35.4766 | 53.66316667 | 14.56766667 |
| 334 | 2004 | 4   | 169.71  | 53.66016667 | 14.54583333 |
| 335 | 2004 | 3.8 | 930.651 | 53.65850000 | 14.54383333 |
| 336 | 2004 | 3.4 | 178.393 | 53.65716667 | 14.54016667 |
| 337 | 2004 | 2.2 | 8.46609 | 53.65600000 | 14.54233333 |
| 338 | 2004 | 3   | 1629.23 | 53.64633333 | 14.55233333 |
| 339 | 2004 | 2.4 | 528.615 | 53.64233333 | 14.55233333 |
| 340 | 2004 | 3.2 | 602.058 | 53.63466667 | 14.56800000 |
| 341 | 2004 | 3.8 | 197.571 | 53.53366667 | 14.62983333 |
| 342 | 2004 | 1.9 | 1001.72 | 53.53366667 | 14.62900000 |
| 343 | 2004 | 1.5 | 2.69506 | 53.53366667 | 14.62900000 |
| 344 | 2004 | 2.5 | 0       | 53.50433333 | 14.62700000 |
| 345 | 2004 | 1.9 | 22.2297 | 53.46183333 | 14.60116667 |
| 346 | 2004 | 1.5 | 0       | 53.45116667 | 14.60150000 |
| 347 | 2004 | 1   | 0       | 53.45116667 | 14.60150000 |
| 348 | 2004 | 0.7 | 3.65032 | 53.45116667 | 14.60150000 |
| 349 | 2004 | 2.5 | 0       | 53.44350000 | 14.61983333 |
| 350 | 2004 | 2.2 | 0       | 53.43716667 | 14.63733333 |
| 351 | 2004 | 4.3 | 0       | 53.43566667 | 14.63916667 |
| 352 | 2004 | 2.3 | 0       | 53.41733333 | 14.64516667 |
| 353 | 2004 | 1.6 | 23.2849 | 53.40933333 | 14.64450000 |
| 354 | 2004 | 2.5 | 20.5258 | 53.40133333 | 14.64266667 |
| 355 | 2004 | 2.4 | 20.6634 | 53.43766667 | 14.64450000 |
| 356 | 2004 | 2.1 | 171.991 | 53.45533333 | 14.64366667 |
| 357 | 2004 | 1.5 | 274.555 | 53.45533333 | 14.64366667 |
| 358 | 2004 | 1.5 | 188.368 | 53.45533333 | 14.64366667 |
| 359 | 2004 | 3   | 0       | 53.45766667 | 14.65400000 |
| 360 | 2004 | 2.7 | 4009.24 | 53.46183333 | 14.69150000 |
| 361 | 2004 | 2.7 | 0       | 53.46216667 | 14.69983333 |
| 362 | 2004 | 2   | 1891.39 | 53.46216667 | 14.70550000 |
| 363 | 2004 | 1.5 | 174.547 | 53.46216667 | 14.70683333 |
| 364 | 2004 | 2.3 | 2310.15 | 53.47033333 | 14.68616667 |
| 365 | 2004 | 2.7 | 38900.6 | 53.48050000 | 14.69116667 |
| 366 | 2004 | 2.4 | 866.74  | 53.48066667 | 14.69350000 |
| 367 | 2004 | 1.8 | 0       | 53.48066667 | 14.69350000 |
| 368 | 2004 | 1.5 | 384.603 | 53.48066667 | 14.69350000 |
| 369 | 2004 | 1   | 150.17  | 53.48066667 | 14.69350000 |
| 370 | 2004 | 1.5 | 156.98  | 53.48066667 | 14.69350000 |

|     |      |     |         |             |             |
|-----|------|-----|---------|-------------|-------------|
| 371 | 2004 | 3.5 | 40.5742 | 53.48116667 | 14.68733333 |
| 372 | 2004 | 3.1 | 0       | 53.49066667 | 14.65233333 |
| 373 | 2004 | 2.8 | 0       | 53.49300000 | 14.64350000 |
| 374 | 2004 | 2.5 | 0       | 53.49366667 | 14.64033333 |
| 375 | 2004 | 2.7 | 1442.3  | 53.50266667 | 14.65333333 |
| 376 | 2004 | 2   | 2833.21 | 53.51633333 | 14.65116667 |
| 377 | 2004 | 3   | 255.862 | 53.51766667 | 14.65633333 |
| 378 | 2004 | 3.1 | 932.765 | 53.51866667 | 14.66433333 |
| 379 | 2004 | 2.5 | 2256.85 | 53.51933333 | 14.67183333 |
| 380 | 2004 | 2.5 | 71.1954 | 53.51966667 | 14.67666667 |
| 381 | 2004 | 2.3 | 713.538 | 53.52550000 | 14.66900000 |
| 382 | 2004 | 3.3 | 279.583 | 53.52466667 | 14.65166667 |
| 383 | 2004 | 8.3 | 0       | 53.51466667 | 14.63766667 |
| 384 | 2004 | 5.8 | 1001.6  | 53.51583333 | 14.63816667 |
| 385 | 2004 | 5   | 0       | 53.87400000 | 14.28200000 |
| 386 | 2004 | 4   | 0       | 53.87366667 | 14.28266667 |
| 387 | 2004 | 3   | 0       | 53.87366667 | 14.28266667 |
| 388 | 2004 | 2.5 | 0       | 53.87366667 | 14.28266667 |
| 389 | 2004 | 1   | 12.8503 | 53.87366667 | 14.28266667 |
| 390 | 2004 | 3.1 | 8.40567 | 53.86816667 | 14.39183333 |
| 391 | 2004 | 1.8 | 1.42741 | 53.86966667 | 14.39416667 |
| 392 | 2004 | 4   | 0       | 53.86466667 | 14.38683333 |
| 393 | 2004 | 2   | 2.05345 | 53.88983333 | 14.41150000 |
| 394 | 2004 | 2   | 18.5007 | 53.89216667 | 14.40250000 |
| 395 | 2004 | 1.8 | 11.4134 | 53.89283333 | 14.38983333 |
| 396 | 2004 | 2.7 | 0       | 53.88150600 | 14.42235500 |
| 397 | 2004 | 1.7 | 30.0786 | 53.88324300 | 14.34567900 |
| 398 | 2004 | 1   | 19.9987 | 53.88247500 | 14.34377700 |
| 399 | 2004 | 0.7 | 0       | 53.88232400 | 14.34158200 |
| 400 | 2004 | 3   | 25.2573 | 53.88068500 | 14.34377100 |
| 401 | 2004 | 1.5 | 11.2188 | 53.88048000 | 14.34526300 |
| 402 | 2004 | 1   | 3.52339 | 53.88115700 | 14.37215500 |
| 403 | 2004 | 2.5 | 0       | 53.88218700 | 14.36547000 |
| 404 | 2004 | 3   | 0       | 53.88113200 | 14.35737400 |
| 405 | 2004 | 2.7 | 6.51132 | 53.83877600 | 14.37940300 |
| 406 | 2004 | 2   | 14.4246 | 53.83959600 | 14.38157900 |
| 407 | 2004 | 0.7 | 91.1269 | 53.84049600 | 14.38348100 |
| 408 | 2004 | 3   | 0       | 53.84139800 | 14.38592600 |
| 409 | 2004 | 4.5 | 0       | 53.84351100 | 14.38781300 |
| 410 | 2004 | 1.5 | 131.161 | 53.84537800 | 14.38915400 |
| 411 | 2004 | 2.8 | 8.66478 | 53.84667400 | 14.38954500 |
| 412 | 2004 | 2.5 | 10.8601 | 53.85282400 | 14.39000300 |
| 413 | 2004 | 1   | 0       | 53.85491300 | 14.38737300 |
| 414 | 2004 | 0.8 | 405.384 | 53.85586800 | 14.38434900 |
| 415 | 2004 | 7.5 | 0       | 53.86725500 | 14.28163300 |
| 416 | 2004 | 3   | 0       | 53.86555300 | 14.28111500 |
| 417 | 2004 | 1   | 47.2855 | 53.86578500 | 14.27933200 |
| 418 | 2004 | 9.2 | 0       | 53.85933000 | 14.28190600 |
| 419 | 2004 | 3.3 | 0       | 53.85899100 | 14.29299400 |
| 420 | 2004 | 1.5 | 0       | 53.86567100 | 14.42322900 |
| 421 | 2004 | 1.5 | 0       | 53.86736300 | 14.42170000 |
| 422 | 2004 | 0.5 | 0       | 53.86581600 | 14.41966900 |
| 423 | 2004 | 1   | 163.016 | 53.86603900 | 14.41569700 |



|     |      |     |         |             |             |
|-----|------|-----|---------|-------------|-------------|
| 424 | 2004 | 0.5 | 35.3721 | 53.86667000 | 14.41226700 |
| 425 | 2004 | 1.5 | 48.0677 | 53.88848000 | 14.42573800 |
| 426 | 2004 | 1.5 | 0       | 53.88931600 | 14.43140600 |
| 427 | 2004 | 0.7 | 27.4478 | 53.88937800 | 14.42743700 |
| 428 | 2004 | 0.5 | 23.1191 | 53.88898100 | 14.42894900 |
| 429 | 2004 | 1   | 0       | 53.88789300 | 14.42985300 |
| 430 | 2004 | 2   | 0       | 53.89706300 | 14.43249700 |
| 431 | 2004 | 1   | 20.5046 | 53.90220200 | 14.43533750 |
| 432 | 2004 | 1   | 128.162 | 53.90099200 | 14.43514600 |
| 433 | 2004 | 1   | 0       | 53.89674500 | 14.43684000 |
| 434 | 2004 | 1   | 305.25  | 53.89978900 | 14.43639000 |
| 435 | 2004 | 1.3 | 0       | 53.89356600 | 14.42935100 |
| 436 | 2004 | 1   | 0       | 53.89221500 | 14.42986100 |
| 437 | 2004 | 1   | 58.4919 | 53.89185900 | 14.41125700 |
| 438 | 2004 | 1.5 | 15.3239 | 53.88888400 | 14.41588300 |
| 439 | 2004 | 1   | 65.6825 | 53.87359500 | 14.38325200 |
| 440 | 2004 | 1.5 | 0       | 53.87167300 | 14.38557200 |
| 441 | 2004 | 1   | 30.3095 | 53.86864300 | 14.31740400 |
| 442 | 2004 | 1   | 133.135 | 53.87074700 | 14.28022200 |
| 443 | 2004 | 1   | 147.3   | 53.72612300 | 14.28285600 |
| 444 | 2004 | 2   | 0       | 53.72488300 | 14.27765900 |
| 445 | 2004 | 5   | 322.713 | 53.83937700 | 14.61916400 |
| 446 | 2004 | 1.5 | 0       | 53.98012900 | 14.76696900 |
| 447 | 2004 | 1.5 | 0       | 53.97880100 | 14.76980500 |
| 448 | 2004 | 1.2 | 1651.48 | 53.97713600 | 14.77128500 |
| 449 | 2004 | 1   | 318.326 | 53.97734600 | 14.77671500 |
| 450 | 2004 | 2   | 0       | 53.97602400 | 14.78317100 |
| 451 | 2004 | 1.2 | 0       | 53.65769700 | 14.52840300 |
| 452 | 2004 | 0.7 | 65.8423 | 53.65598200 | 14.53336200 |
| 453 | 2004 | 0.5 | 0       | 53.65947100 | 14.52164500 |
| 454 | 2004 | 1.5 | 386.657 | 53.55635400 | 14.59644900 |
| 455 | 2004 | 1   | 111.94  | 53.55438900 | 14.59730700 |
| 456 | 2004 | 1   | 256.772 | 53.55330000 | 14.59983800 |
| 457 | 2004 | 0.5 | 24.3458 | 53.55210800 | 14.60343400 |
| 458 | 2013 | 6   | 0       | 53.78990000 | 14.44650000 |
| 459 | 2013 | 5.9 | 0       | 53.82289200 | 14.50630800 |
| 460 | 2013 | 6.2 | 0       | 53.78654000 | 14.41110900 |
| 461 | 2013 | 3.3 | 0       | 53.59470700 | 14.59063000 |
| 462 | 2013 | 3   | 0       | 53.57804500 | 14.59362000 |
| 463 | 2013 | 4.2 | 0       | 53.54979400 | 14.61596300 |
| 464 | 2013 | 3.2 | 0       | 53.54424200 | 14.62717600 |
| 465 | 2013 | 3.5 | 0       | 53.51262300 | 14.65951500 |
| 466 | 2013 | 2.9 | 0       | 53.44689200 | 14.62533700 |
| 467 | 2013 | 3.5 | 0       | 53.45341800 | 14.65089100 |
| 468 | 2013 | 2.1 | 0       | 53.46477400 | 14.65566200 |
| 469 | 2013 | 3   | 0       | 53.47967700 | 14.65038800 |
| 470 | 2013 | 3   | 0       | 53.41185500 | 14.65077400 |
| 471 | 2013 | 3.3 | 0       | 53.42496200 | 14.64225700 |
| 472 | 2013 | 2   | 0       | 53.43107800 | 14.64131900 |
| 473 | 2013 | 1.8 | 0       | 53.43398500 | 14.61387000 |
| 474 | 2014 | 1   | 488     | 53.73723200 | 14.30063000 |
| 475 | 2014 | 0.5 | 500     | 53.74138700 | 14.29494000 |
| 476 | 2014 | 1.2 | 0       | 53.74481700 | 14.30861100 |

|     |      |     |      |             |             |
|-----|------|-----|------|-------------|-------------|
| 477 | 2014 | 0.2 | 150  | 53.74259500 | 14.30729600 |
| 478 | 2014 | 1.5 | 0    | 53.68907900 | 14.39566500 |
| 479 | 2014 | 2   | 0    | 53.69023300 | 14.39696000 |
| 480 | 2014 | 2.8 | 0    | 53.69180100 | 14.39914700 |
| 481 | 2014 | 3.2 | 0    | 53.69304000 | 14.40120000 |
| 482 | 2014 | 4.1 | 0    | 53.69444100 | 14.40290600 |
| 483 | 2014 | 4.4 | 0    | 53.69563500 | 14.40406200 |
| 484 | 2014 | 4.7 | 0    | 53.69650600 | 14.40612100 |
| 485 | 2014 | 2   | 1798 | 53.75345000 | 14.31051400 |
| 486 | 2014 | 6   | 0    | 53.76769500 | 14.32349700 |
| 487 | 2014 | 0.5 | 79   | 53.89056600 | 14.42708800 |
| 488 | 2014 | 0.7 | 210  | 53.88954400 | 14.42603700 |
| 489 | 2014 | 0.2 | 79   | 53.89269400 | 14.42664900 |
| 490 | 2014 | 1.7 | 120  | 53.89033200 | 14.42881300 |
| 491 | 2014 | 0.5 | 79   | 53.89647800 | 14.42807300 |
| 492 | 2014 | 2.4 | 0    | 53.89504500 | 14.43227400 |
| 493 | 2014 | 1.5 | 145  | 53.85329300 | 14.52341400 |
| 494 | 2014 | 1.4 | 159  | 53.85271000 | 14.49901600 |
| 495 | 2014 | 2.6 | 87   | 53.84434700 | 14.53874400 |
| 496 | 2014 | 2.6 | 201  | 53.83935000 | 14.54895100 |
| 497 | 2014 | 2.1 | 151  | 53.85268200 | 14.54045400 |
| 498 | 2014 | 0.5 | 95   | 53.85497200 | 14.55713600 |
| 499 | 2014 | 0.7 | 95   | 53.85267000 | 14.56322100 |
| 500 | 2014 | 1.2 | 153  | 53.85904000 | 14.53186700 |
| 501 | 2014 | 2.1 | 95   | 53.84273700 | 14.57462300 |
| 502 | 2014 | 1.5 | 154  | 53.83422800 | 14.57831100 |
| 503 | 2014 | 0.8 | 150  | 53.86086900 | 14.50498000 |
| 504 | 2014 | 1.4 | 0    | 53.83656100 | 14.52867900 |
| 505 | 2014 | 1.3 | 412  | 53.67049800 | 14.52977800 |
| 506 | 2014 | 4.5 | 403  | 53.67042000 | 14.53779200 |
| 507 | 2014 | 5.5 | 400  | 53.66973900 | 14.53706600 |
| 508 | 2014 | 5.2 | 430  | 53.66812200 | 14.54450300 |
| 509 | 2014 | 3.1 | 152  | 53.67772900 | 14.52474500 |
| 510 | 2014 | 0.8 | 0    | 53.97425900 | 14.75486500 |
| 511 | 2014 | 0.5 | 0    | 53.97792100 | 14.74597300 |
| 512 | 2014 | 0.9 | 570  | 53.98035700 | 14.70981500 |
| 513 | 2014 | 1.1 | 572  | 53.97648500 | 14.71049900 |
| 514 | 2014 | 1.5 | 329  | 53.92765700 | 14.68253400 |
| 515 | 2014 | 1.2 | 331  | 53.91724200 | 14.66915300 |
| 516 | 2014 | 1.8 | 0    | 53.92383400 | 14.67724200 |
| 517 | 2014 | 1.5 | 0    | 53.90603500 | 14.65911200 |
| 518 | 2014 | 0.8 | 0    | 53.89302100 | 14.63541100 |
| 519 | 2014 | 1   | 0    | 53.89007700 | 14.63467200 |
| 520 | 2014 | 0.9 | 301  | 53.87366200 | 14.62220400 |
| 521 | 2014 | 0.9 | 359  | 53.87898000 | 14.62945800 |
| 522 | 2014 | 1.2 | 298  | 53.88850600 | 14.63402200 |
| 523 | 2014 | 0.9 | 329  | 53.86571400 | 14.62061600 |
| 524 | 2014 | 1.8 | 362  | 53.86346600 | 14.62295900 |
| 525 | 2014 | 0.5 | 331  | 53.85600600 | 14.62070400 |
| 526 | 2014 | 0.5 | 15   | 53.72669000 | 14.30118200 |
| 527 | 2014 | 0.5 | 25   | 53.72669000 | 14.30118200 |
| 528 | 2014 | 6   | 0    | 53.78080500 | 14.31605000 |
| 529 | 2014 | 6.3 | 0    | 53.77542500 | 14.31810800 |

|     |      |      |      |             |             |
|-----|------|------|------|-------------|-------------|
| 530 | 2014 | 5.6  | 0    | 53.78269500 | 14.28748800 |
| 531 | 2014 | 5.7  | 0    | 53.77501200 | 14.29484300 |
| 532 | 2014 | 4.9  | 0    | 53.79201000 | 14.28357500 |
| 533 | 2014 | 1.6  | 0    | 53.79647000 | 14.29523400 |
| 534 | 2014 | 4.1  | 0    | 53.80087500 | 14.26962100 |
| 535 | 2014 | 1.5  | 320  | 53.90358300 | 14.65119000 |
| 536 | 2014 | 1.5  | 340  | 53.89553200 | 14.63705900 |
| 537 | 2014 | 3.6  | 1930 | 53.80003100 | 14.56395400 |
| 538 | 2014 | 3.5  | 1720 | 53.78910000 | 14.56374900 |
| 539 | 2014 | 3    | 1800 | 53.77575400 | 14.57295400 |
| 540 | 2014 | 2.7  | 1630 | 53.76361300 | 14.57689400 |
| 541 | 2014 | 2.3  | 1940 | 53.75853600 | 14.58012500 |
| 542 | 2014 | 1.9  | 2200 | 53.76528800 | 14.59802800 |
| 543 | 2014 | 1    | 1790 | 53.76777400 | 14.60913700 |
| 544 | 2014 | 1.8  | 2100 | 53.77754000 | 14.60665800 |
| 545 | 2014 | 2.5  | 890  | 53.78245100 | 14.60263700 |
| 546 | 2014 | 2.1  | 2300 | 53.78932100 | 14.60002600 |
| 547 | 2014 | 2.1  | 1790 | 53.79498100 | 14.60188200 |
| 548 | 2014 | 2.6  | 2400 | 53.80279300 | 14.59995800 |
| 549 | 2014 | 2.4  | 450  | 53.79152900 | 14.58441100 |
| 550 | 2014 | 3.5  | 1680 | 53.78894400 | 14.57266100 |
| 551 | 2014 | 3.5  | 1900 | 53.77966400 | 14.58643700 |
| 552 | 2014 | 3.4  | 1400 | 53.77092000 | 14.59224900 |
| 553 | 2014 | 3.5  | 2100 | 53.77092000 | 14.59224900 |
| 554 | 2014 | 2.8  | 960  | 53.81947500 | 14.60085400 |
| 555 | 2014 | 2.6  | 990  | 53.82618400 | 14.60684200 |
| 556 | 2014 | 2.1  | 2000 | 53.80933900 | 14.55860400 |
| 557 | 2014 | 1.7  | 0    | 53.80295300 | 14.56424200 |
| 558 | 2014 | 1.8  | 0    | 53.78284700 | 14.55442700 |
| 559 | 2014 | 1.3  | 0    | 53.76768200 | 14.55554200 |
| 560 | 2014 | 1.3  | 0    | 53.76060600 | 14.55323200 |
| 561 | 2014 | 1.3  | 0    | 53.80186400 | 14.54992800 |
| 562 | 2014 | 6    | 0    | 53.78727300 | 14.50555330 |
| 563 | 2014 | 5.7  | 0    | 53.78209000 | 14.48316100 |
| 564 | 2014 | 5.3  | 0    | 53.77184000 | 14.46626800 |
| 565 | 2014 | 5.4  | 0    | 53.75255800 | 14.47382600 |
| 566 | 2014 | 6.1  | 0    | 53.76727700 | 14.36167900 |
| 567 | 2014 | 10.6 | 0    | 53.77009300 | 14.39599100 |
| 568 | 2014 | 5.6  | 0    | 53.76725300 | 14.43165600 |
| 569 | 2014 | 5.1  | 0    | 53.73568100 | 14.45051700 |
| 570 | 2014 | 5.3  | 0    | 53.71170000 | 14.48196000 |
| 571 | 2014 | 4.9  | 0    | 53.69984600 | 14.44399700 |
| 572 | 2014 | 5.8  | 0    | 53.71856000 | 14.41642800 |
| 573 | 2014 | 5.7  | 0    | 53.73499000 | 14.38568800 |
| 574 | 2014 | 5.7  | 0    | 53.75077900 | 14.37782700 |
| 575 | 2014 | 5.8  | 0    | 53.78679900 | 14.34738100 |
| 576 | 2014 | 5.2  | 0    | 53.79808400 | 14.34338600 |
| 577 | 2014 | 6    | 0    | 53.77131300 | 14.34125900 |
| 578 | 2014 | 6.1  | 0    | 53.75106200 | 14.36001700 |
| 579 | 2014 | 5.4  | 0    | 53.73211240 | 14.41560400 |
| 580 | 2014 | 5.9  | 0    | 53.75134500 | 14.41533700 |
| 581 | 2014 | 5.8  | 0    | 53.78737400 | 14.38492300 |
| 582 | 2014 | 5.4  | 0    | 53.69510400 | 14.47898800 |

|     |      |     |      |             |             |
|-----|------|-----|------|-------------|-------------|
| 583 | 2014 | 5.1 | 0    | 53.71871600 | 14.44946700 |
| 584 | 2014 | 5.1 | 0    | 53.71946900 | 14.37257000 |
| 585 | 2014 | 6.1 | 0    | 53.80644900 | 14.51772400 |
| 586 | 2014 | 6.1 | 0    | 53.80105200 | 14.48849900 |
| 587 | 2014 | 5.2 | 0    | 53.83987200 | 14.48866300 |
| 588 | 2014 | 5.3 | 0    | 53.70688400 | 14.50171100 |
| 589 | 2014 | 2.3 | 8700 | 53.79093000 | 14.59285000 |
| 590 | 2014 | 3.4 | 399  | 53.77403700 | 14.59412700 |
| 591 | 2014 | 3.2 | 502  | 53.78166300 | 14.56541700 |
| 592 | 2014 | 1.9 | 0    | 53.73152800 | 14.28801200 |
| 593 | 2014 | 1.7 | 0    | 53.70381100 | 14.28546300 |
| 594 | 2014 | 2.8 | 2430 | 53.80749200 | 14.39433900 |
| 595 | 2014 | 4.8 | 2670 | 53.81258500 | 14.47546300 |
| 596 | 2014 | 4.8 | 2260 | 53.80411600 | 14.45678600 |
| 597 | 2014 | 5   | 2500 | 53.79786700 | 14.42996900 |
| 598 | 2014 | 4.8 | 0    | 53.79656200 | 14.39433800 |
| 599 | 2014 | 5.9 | 0    | 53.79548500 | 14.40517500 |
| 600 | 2014 | 6.1 | 0    | 53.79502700 | 14.42714300 |
| 601 | 2014 | 5.7 | 0    | 53.80205100 | 14.45856300 |
| 602 | 2014 | 6   | 0    | 53.80967400 | 14.47772800 |
| 603 | 2014 | 5.5 | 0    | 53.81680600 | 14.49292500 |
| 604 | 2014 | 5.7 | 0    | 53.82717200 | 14.49327700 |
| 605 | 2014 | 4.3 | 0    | 53.80271700 | 14.38188300 |
| 606 | 2014 | 3.4 | 569  | 53.80292700 | 14.44406700 |
| 607 | 2014 | 2.8 | 611  | 53.81009200 | 14.46562300 |
| 608 | 2014 | 4.8 | 608  | 53.81818500 | 14.48478700 |
| 609 | 2014 | 4.7 | 530  | 53.82993900 | 14.47938700 |
| 610 | 2014 | 2.9 | 598  | 53.80790200 | 14.40101900 |
| 611 | 2014 | 2.6 | 603  | 53.81834100 | 14.39704900 |
| 612 | 2014 | 2.5 | 612  | 53.81110500 | 14.42007800 |
| 613 | 2014 | 2   | 589  | 53.81115200 | 14.42978900 |
| 614 | 2014 | 2.3 | 21   | 53.81481500 | 14.46827000 |
| 615 | 2014 | 2.6 | 23   | 53.81692100 | 14.47588600 |
| 616 | 2014 | 2.2 | 28   | 53.82217300 | 14.47024700 |
| 617 | 2014 | 1.9 | 0    | 53.82217700 | 14.43011700 |
| 618 | 2014 | 1.8 | 0    | 53.82493900 | 14.41654300 |
| 619 | 2014 | 2.4 | 0    | 53.83138900 | 14.36914700 |
| 620 | 2014 | 2.4 | 0    | 53.82815800 | 14.38209600 |
| 621 | 2014 | 1.6 | 0    | 53.83734800 | 14.39199700 |
| 622 | 2014 | 2.1 | 0    | 53.84273700 | 14.43414000 |
| 623 | 2014 | 4.7 | 0    | 53.85172100 | 14.48326000 |
| 624 | 2014 | 5.8 | 0    | 53.86154700 | 14.42687300 |
| 625 | 2014 | 2.1 | 0    | 53.87513200 | 14.41106100 |
| 626 | 2014 | 1.4 | 0    | 53.87654800 | 14.39254500 |
| 627 | 2014 | 1   | 0    | 53.86187200 | 14.47755600 |
| 628 | 2014 | 2.5 | 0    | 54.01970600 | 14.79269700 |
| 629 | 2014 | 3.4 | 0    | 54.00115600 | 14.74928900 |
| 630 | 2014 | 3.4 | 0    | 53.98753000 | 14.72251200 |
| 631 | 2014 | 2.2 | 0    | 53.94574800 | 14.74578800 |
| 632 | 2014 | 2.3 | 0    | 53.93558700 | 14.75287600 |
| 633 | 2014 | 0.8 | 0    | 53.92805900 | 14.75739000 |
| 634 | 2014 | 2.8 | 0    | 53.93131900 | 14.69925500 |
| 635 | 2014 | 2.2 | 0    | 53.94151200 | 14.70620900 |

|     |      |      |      |             |             |
|-----|------|------|------|-------------|-------------|
| 636 | 2014 | 3.5  | 0    | 53.98647000 | 14.75513300 |
| 637 | 2014 | 3.3  | 2550 | 54.00613000 | 14.73966200 |
| 638 | 2014 | 1    | 2421 | 53.99844800 | 14.71782000 |
| 639 | 2014 | 3    | 2485 | 53.99793600 | 14.70053500 |
| 640 | 2014 | 2.8  | 570  | 53.98408900 | 14.70191300 |
| 641 | 2014 | 2.1  | 572  | 53.97259500 | 14.70231400 |
| 642 | 2014 | 2    | 550  | 53.96891500 | 14.69994400 |
| 643 | 2014 | 3.1  | 592  | 53.95542100 | 14.69173300 |
| 644 | 2014 | 0.4  | 571  | 53.97036400 | 14.71479500 |
| 645 | 2014 | 3    | 0    | 53.97599900 | 14.70732500 |
| 646 | 2014 | 2.5  | 0    | 53.96780000 | 14.70626400 |
| 647 | 2014 | 3.1  | 0    | 53.99653600 | 14.70622100 |
| 648 | 2014 | 3.2  | 0    | 53.99695700 | 14.72476800 |
| 649 | 2014 | 6.1  | 0    | 53.80504600 | 14.52856100 |
| 650 | 2014 | 1.2  | 0    | 53.81165200 | 14.54076700 |
| 651 | 2014 | 1.7  | 0    | 53.79023600 | 14.55122700 |
| 652 | 2014 | 6.3  | 0    | 53.79098500 | 14.53131800 |
| 653 | 2014 | 6    | 0    | 53.78056700 | 14.53178900 |
| 654 | 2014 | 5.2  | 0    | 53.83658400 | 14.50975600 |
| 655 | 2014 | 1.6  | 0    | 53.84471200 | 14.52275100 |
| 656 | 2014 | 1.9  | 0    | 53.82749200 | 14.43197300 |
| 657 | 2014 | 5.3  | 0    | 53.76118100 | 14.50681200 |
| 658 | 2014 | 5.4  | 0    | 53.75978400 | 14.52425900 |
| 659 | 2014 | 1.1  | 0    | 53.74839700 | 14.54370900 |
| 660 | 2014 | 5.1  | 0    | 53.73712200 | 14.51629900 |
| 661 | 2014 | 5.2  | 0    | 53.72217800 | 14.51537800 |
| 662 | 2014 | 1.3  | 0    | 53.72931000 | 14.54164600 |
| 663 | 2014 | 5.2  | 0    | 53.70398400 | 14.51229100 |
| 664 | 2014 | 5.8  | 0    | 53.68916900 | 14.51481200 |
| 665 | 2014 | 10.7 | 0    | 53.67812500 | 14.51849800 |
| 666 | 2014 | 5.2  | 0    | 53.72598200 | 14.51245800 |
| 667 | 2014 | 4.6  | 0    | 53.69125800 | 14.41756100 |
| 668 | 2014 | 5    | 0    | 53.68563200 | 14.49509500 |
| 669 | 2014 | 4.7  | 0    | 53.69817300 | 14.40832900 |
| 670 | 2014 | 5.3  | 0    | 53.73356400 | 14.35951500 |
| 671 | 2014 | 6    | 0    | 53.76976900 | 14.32719900 |
| 672 | 2014 | 3.9  | 0    | 53.64886100 | 14.56834700 |
| 673 | 2014 | 3.5  | 0    | 53.64301200 | 14.57648800 |
| 674 | 2014 | 2.5  | 0    | 53.65120100 | 14.59131400 |
| 675 | 2014 | 3.9  | 0    | 53.66076500 | 14.55266200 |
| 676 | 2014 | 3    | 0    | 53.62852000 | 14.57769300 |
| 677 | 2014 | 3.2  | 0    | 53.63428500 | 14.58743700 |
| 678 | 2014 | 1.3  | 0    | 53.63546200 | 14.60926400 |
