# Supplementary material for: The Importance of Non-Native Prey, the Zebra Mussel Dreissena polymorpha, for the Declining Greater Scaup Aythya marila: A Case Study at a Key European Staging and Wintering Site
Source: PubMed Central journal article supplement (PMC4692530; doi:10.1371/journal.pone.0145496), 2015-12-28
Supplement: pone.0145496.s006.pdf [file pone.0145496.s006.pdf]

| No | shortc | Subarea         | km <sup>2</sup> | JAN02 | NOV02 | JAN03 | MA03 | NOV03 | JAN04 | MA04  | NOV04 | JAN05 | MA05  | NOV05 |
|----|--------|-----------------|-----------------|-------|-------|-------|------|-------|-------|-------|-------|-------|-------|-------|
| 1  | WL     | Lake Wicko      | 11.06           | 0     | 15    | 0     | 0    | 0     | 0     | 0     | 0     | 0     | ?     | ?     |
| 2  | SW     | Świna River     | 12.75           | 0     | 40    | 0     | 0    | 0     | 0     | 4     | 0     | 0     | ?     | ?     |
| 3  | SCK    | Skoszewska Cove | 16.7            | 40    | 4500  | 0     | 2500 | 0     | 0     | 5300  | 5000  | 50    | 25000 | ?     |
| 4  | SU     | Sułomino        | 28.4            | 0     | 0     | 0     | 0    | 0     | 0     | 4200  | 2000  | 800   | 4000  | ?     |
| 5  | KW     | Krzecki Wyskok  | 57.93           | 0     | 1502  | 0     | 0    | 0     | 0     | 3000  | ?     | 0     | 2000  | ?     |
| 6  | ML     | Main Lagoon     | 154.7           | 0     | 0     | 0     | 0    | 0     | 0     | 0     | ?     | 0     | ?     | ?     |
| 7  | RE     | Refulat         | 23.45           | 0     | 0     | 0     | 0    | 0     | 0     | 100   | ?     | 0     | ?     | ?     |
| 8  | NWC    | Nowowarp. Cove  | 3.32            | 0     | 0     | 0     | 0    | 30    | 0     | 6     | ?     | 150   | ?     | ?     |
| 9  | NWL    | Lake Nowowarp.  | 6.42            | 0     | 0     | 0     | 0    | 0     | 0     | 0     | ?     | 0     | ?     | ?     |
| 10 | MI     | Miroszewo       | 20.4            | 0     | 800   | 0     | 342  | 3000  | 0     | 44    | ?     | 27000 | ?     | ?     |
| 11 | BR     | Brzózki         | 11.95           | 0     | 2     | 0     | 0    | 200   | 0     | 0     | ?     | 3000  | ?     | ?     |
| 12 | TR     | Trzebież        | 11.05           | 0     | 0     | 0     | 0    | 130   | 2     | 0     | ?     | 6150  | ?     | 5785  |
| 13 | CZ     | Czarnocin       | 24.5            | 0     | 0     | 0     | 500  | 0     | 0     | 2     | ?     | 3000  | ?     | ?     |
| 14 | RO     | Roztoka         | 29.1            | 0     | 6400  | 0     | 1010 | 2200  | 0     | 11    | 12830 | 16000 | 1560  | 250   |
| 15 | OR     | Odra River      | 9.2             | 3     | 1     | 57    | 0    | 1     | 0     | 0     | 0     | 0     | 0     | ?     |
| 16 | DLN    | Lake Dąbie N    | 19.1            | 0     | 3200  | 0     | 600  | 4000  | 0     | 1548  | 3000  | 800   | 3     | 250   |
| 17 | DLC    | Lake Dąbie C    | 29.5            | 0     | 0     | 0     | 100  | 105   | 0     | 0     | 200   | 0     | ?     | ?     |
| 18 | CLS    | Lake Dąbie S    | 7.8             | 0     | 0     | 0     | 0    | 0     | 0     | 300   | 0     | 0     | ?     | ?     |
| 19 | DZ     | Dziwna          | 12.6            | 0     | 0     | 0     | 0    | 0     | 0     | 0     | 0     | 1000  | ?     | ?     |
| 20 | KL     | Kamień Lagoon   | 25.3            | 1     | 1     | 1     | 0    | 0     | 0     | 0     | 120   | 0     | ?     | ?     |
| 21 | WL     | Lake Wrzosowo   | 6.05            | 0     | 0     | 0     | 0    | 0     | 0     | 0     | 0     | 0     | ?     | ?     |
| 22 | CC     | Cicha Cove      | 1.3             | 0     | 0     | 0     | 0    | 0     | 0     | 0     | 0     | 0     | ?     | ?     |
|    |        | TOTAL           | 522.88          | 44    | 16461 | 58    | 5052 | 9666  | 2     | 14515 | ?     | 57950 | ?     | 6285  |
|    |        | ICE COVER<80%   |                 | YES   | NO    | YES   | NO   | NO    | YES   | NO    | NO    | NO    | NO    | NO    |
|    |        | AT LEAST        |                 | 44    | 16461 | 58    | 5052 | 9666  | 2     | 14515 | 23150 | 57950 | 32563 | 6285  |

| JAN06 | APR06 | NOV07 | JAN08 | MA08 | NOV08 | JAN09 | MA09  | NOV09 | JAN10 | APR10 | NOV10 | JAN11 | MA11  | APR11  |
|-------|-------|-------|-------|------|-------|-------|-------|-------|-------|-------|-------|-------|-------|--------|
| 0     | 0     | ?     | ?     | ?    | 0     | 0     | 0     | 10    | 0     | 0     | 0     | 0     | 0     | 0      |
| 0     | 0     | ?     | ?     | ?    | 0     | 0     | 0     | 0     | 0     | 0     | 2     | 0     | 0     | 0      |
| 0     | 1500  | ?     | ?     | ?    | 80    | 0     | 23000 | 500   | 0     | 5000  | 50    | 0     | 6800  | 37800  |
| 0     | 1500  | 0     | ?     | ?    | 200   | 0     | 5000  | 400   | 0     | 0     | 10    | 400   | 451   | 42600  |
| 0     | 0     | ?     | ?     | ?    | 2000  | 0     | 7500  | 2600  | 0     | 2000  | 0     | 4600  | 3100  | 4533   |
| 0     | 0     | 0     | ?     | ?    | 0     | 0     | 0     | 0     | 0     | 10    | 0     | 0     | 100   | 1500   |
| 0     | 0     | 0     | ?     | 0    | 0     | 0     | 0     | 0     | 0     | 0     | 0     | 0     | 310   | 2      |
| 0     | 0     | 0     | ?     | 0    | 0     | 0     | 0     | 0     | 0     | 0     | 0     | 0     | 120   | 0      |
| 0     | 0     | 0     | ?     | 0    | 0     | 0     | 0     | 0     | 0     | 0     | 0     | 0     | 40    | 0      |
| 0     | 0     | ?     | ?     | 0    | 3200  | 0     | 2700  | 9000  | 0     | 790   | 21    | 0     | 13907 | 2500   |
| 0     | 0     | ?     | ?     | 0    | 0     | 0     | 300   | 0     | 0     | 200   | 0     | 0     | 3400  | 400    |
| 10    | 0     | 30    | ?     | 0    | 130   | 0     | 0     | 1000  | 0     | 800   | 0     | 0     | 450   | 700    |
| 0     | 0     | ?     | 1170  | 0    | 700   | 0     | 3300  | 500   | 0     | 0     | 400   | 0     | 181   | 5277   |
| 0     | 0     | ?     | ?     | 4760 | 30    | 0     | 0     | 0     | 0     | 0     | 500   | 1     | 199   | 50     |
| 0     | 0     | ?     | 133   | 0    | 0     | 0     | 15    | 0     | 0     | 0     | 0     | 0     | 0     | 0      |
| 0     | 0     | 0     | ?     | ?    | 900   | 0     | 7000  | 400   | 0     | 500   | 1000  | 420   | 10000 | 7000   |
| 0     | 0     | 0     | ?     | ?    | 80    | 0     | 5504  | 0     | 0     | 0     | 800   | 80    | 750   | 3000   |
| 0     | 0     | 0     | ?     | ?    | 0     | 0     | 100   | 0     | 0     | 0     | 330   | 0     | 0     | 350    |
| 0     | 0     | 0     | 0     | 0    | 400   | 0     | 300   | 0     | 0     | 0     | 0     | 0     | 0     | 0      |
| 0     | 2     | 0     | 0     | 0    | 250   | 0     | 220   | 0     | 0     | 0     | 0     | 0     | 0     | 21     |
| 0     | 0     | 0     | 0     | 0    | 50    | 0     | 80    | 0     | 0     | 0     | 0     | 0     | 0     | 0      |
| 0     | 0     | 0     | 0     | 0    | 0     | 0     | 0     | 0     | 0     | 0     | 0     | 0     | 0     | 0      |
| 10    | 3002  | ?     | 1303  | ?    | 8020  | 0     | 55019 | 14410 | 0     | 9300  | 2063  | 5021  | 39808 | 105733 |
| YES   | NO    | NO    | NO    | NO   | NO    | YES   | NO    | NO    | YES   | NO    | NO    | NO    | NO    | NO     |
| 10    | 3002  | 30    | 2606  | 4730 | 8020  | 0     | 55019 | 14410 | 0     | 9300  | 2063  | 5021  | 39808 | 105733 |

| OCT11 | NOV11 | DEC11 | JAN12 | FE12 | MA12  | NOV12 | JAN13 | MA13 | APR13 | OCT13- | OCT13-2 | OCT13-3 | NOV13-1 |
|-------|-------|-------|-------|------|-------|-------|-------|------|-------|--------|---------|---------|---------|
| 0     | 0     | 0     | 2     | 0    | 150   | 500   | 0     | 0    | 0     | ?      | ?       | 0       | ?       |
| 0     | 0     | 17    | 3     | 0    | 0     | 0     | 0     | 0    | 0     | ?      | ?       | 0       | ?       |
| 0     | 0     | 205   | 4500  | 0    | 6790  | 6     | 0     | 0    | 5454  | ?      | ?       | 5600    | ?       |
| 3000  | 330   | 5000  | 600   | 0    | 2505  | 3600  | 0     | 0    | 1500  | ?      | ?       | 2800    | ?       |
| 2852  | 2760  | 1104  | 3000  | 0    | 11000 | 15000 | 0     | 0    | 3500  | ?      | ?       | 30000   | ?       |
| 0     | 30    | 92    | 200   | 0    | 92    | 200   | 0     | 0    | 30    | ?      | ?       | 300     | ?       |
| 0     | 0     | 1     | 7     | 0    | 160   | 330   | 0     | 0    | 0     | ?      | ?       | 0       | ?       |
| 0     | 100   | 0     | 0     | 0    | 200   | 500   | 0     | 0    | 0     | ?      | ?       | 0       | ?       |
| 0     | 700   | 0     | 0     | 0    | 50    | 200   | 0     | 0    | 0     | ?      | ?       | 0       | ?       |
| 3400  | 19070 | 3020  | 0     | 0    | 5520  | 19500 | 1700  | 0    | 15000 | 4600   | 700     | 4280    | 12020   |
| 0     | 3100  | 2000  | 4     | 0    | 140   | 6507  | 0     | 0    | 76    | 4030   | 140     | 5900    | 44      |
| 700   | 397   | 3000  | 0     | 0    | 800   | 60    | 58    | 0    | 2000  | 1200   | 472     | 20      | 200     |
| 0     | 150   | 22    | 3400  | 0    | 211   | 0     | 0     | 0    | 1300  | ?      | ?       | 0       | ?       |
| 320   | 918   | 60    | 69    | 0    | 199   | 855   | 0     | 0    | 250   | ?      | ?       | 0       | ?       |
| ?     | 10    | 92    | 50    | 0    | 6     | 10    | 0     | 0    | 4     | ?      | ?       | ?       | ?       |
| ?     | 450   | ?     | 4500  | 0    | 3000  | 400   | 608   | 0    | 1100  | ?      | ?       | 48900   | ?       |
| ?     | 150   | ?     | 1500  | 0    | 1000  | 75    | 0     | 0    | 62    | ?      | ?       | ?       | ?       |
| ?     | 0     | ?     | 0     | 0    | 82    | 0     | 0     | 0    | 0     | ?      | ?       | ?       | ?       |
| ?     | 0     | 0     | 0     | 0    | 300   | 19    | 70    | 0    | 0     | 0      | ?       | ?       | ?       |
| ?     | 0     | 19    | 200   | 0    | 700   | 0     | 102   | 0    | 172   | 0      | ?       | ?       | ?       |
| ?     | 0     | 0     | 0     | 0    | 0     | 0     | 0     | 0    | 0     | 0      | ?       | ?       | ?       |
| ?     | 0     | 0     | 0     | 0    | 0     | 0     | 0     | 0    | 0     | 0      | ?       | ?       | ?       |
| 10272 | 28355 | 14632 | 18035 | 0    | 32905 | 47762 | 2538  | 0    | 30448 | ?      | ?       | ?       | ?       |
| NO    | NO    | NO    | NO    | YES  | NO    | NO    | NO    | YES  | NO    | NO     | NO      | NO      | NO      |
| 10272 | 28355 | 14632 | 18035 | 0    | 32905 | 47762 | 2538  | 0    | 30448 | 9830   | 1312    | 97800   | 12264   |

| NOV13-2 | NOV13-3 | NOV13-4 | DEC13-1 | DEC13-2 | JAN14-1 | JAN14-2 | MA14  | APR14 |
|---------|---------|---------|---------|---------|---------|---------|-------|-------|
| 0       | ?       | ?       | ?       | 0       | 0       | 0       | 20    | 0     |
| 0       | ?       | ?       | ?       | 0       | 0       | 0       | 0     | 0     |
| 1000    | ?       | ?       | ?       | 2880    | 21000   | 0       | 11220 | 0     |
| 6600    | ?       | ?       | ?       | 2000    | 0       | 0       | 6000  | 6000  |
| 60400   | ?       | ?       | ?       | 20      | 0       | 0       | 3000  | 5000  |
| 50      | ?       | ?       | ?       | 0       | 0       | 0       | 0     | 0     |
| 0       | ?       | ?       | ?       | 0       | 0       | 0       | 2000  | 0     |
| 30      | 0       | 0       | 0       | 0       | 700     | 0       | 35    | 0     |
| 8       | 5       | 12      | 110     | 20      | 600     | 0       | 60    | 0     |
| 4723    | 9332    | 13200   | 17165   | 5090    | 2630    | 3500    | 200   | 0     |
| 410     | 0       | 71      | 3200    | 2600    | 0       | 0       | 0     | 0     |
| 700     | 1000    | 220     | 550     | 250     | 130     | 4000    | 0     | 400   |
| 50      | ?       | ?       | ?       | 600     | 0       | 0       | 11950 | 4000  |
| 212     | ?       | ?       | ?       | 0       | 3620    | 700     | 303   | 1600  |
| 0       | ?       | ?       | ?       | 0       | 0       | 250     | 0     | 0     |
| 5000    | ?       | ?       | ?       | ?       | 6000    | 200     | 4000  | 3200  |
| 1105    | ?       | ?       | ?       | ?       | 0       | 250     | 346   | 2500  |
| 0       | ?       | ?       | ?       | ?       | 0       | 1000    | 0     | 0     |
| 5       | ?       | ?       | ?       | 0       | 0       | ?       | 24    | 0     |
| 2       | ?       | ?       | ?       | ?       | 0       | ?       | 7     | 250   |
| 0       | ?       | ?       | ?       | ?       | 0       | ?       | 0     | 0     |
| 0       | ?       | ?       | ?       | ?       | 0       | ?       | 0     | 0     |
| 80295   | ?       | ?       | ?       | ?       | 34680   | ?       | 39165 | 22950 |
| NO      | NO      | NO      | NO      | NO      | NO      | YES     | NO    | NO    |
| 80295   | 10337   | 13505   | 21025   | 13460   | 34680   | 9900    | 39165 | 22950 |
