# Supplementary material for: The Importance of Non-Native Prey, the Zebra Mussel Dreissena polymorpha, for the Declining Greater Scaup Aythya marila: A Case Study at a Key European Staging and Wintering Site
Source: PLoS One. 2015 Dec 28;10(12):e0145496. doi: 10.1371/journal.pone.0145496 (PMC4692530; doi:10.1371/journal.pone.0145496)
Supplement: S2 Table — Data from the 22 counts of the Greater Scaup Aythya marila in the Odra River Estuary in the period 2002–2014 and data on the occurrence and biomass of the Zebra Mussel Dreissena polymorpha. REG—numeric code for the Odra River Estuary subarea, DATE—census date, WINTER_NUM—numeric code for the winter (Nov-Apr), COUNT_NUM—numeric code for the census, AREA—area (sq km) of the given ORE subarea, SEASON—variable identifying the phenological period in a given winter (1—autumn, 2—winter, 3—spring), AM—raw Scaup numbers, AM_d—density of Scaup per 1 sq km, sqrtAM_d—square root of the AM_d. (XLSX) [file pone.0145496.s005.xlsx]

## Sheet: Arkusz1
REG	DATE	WINTER_NUM	COUNT_NUM	AREA	DPA	DPD	SEASON	AM	AM_d	sqrtAM_d
3	28/03/2009	4	7	20.73	12.17	1800	3	23369	1127.303425	33.5753395366302
16	28/03/2009	4	7	20.22	8.53	1816.424385	3	7231	357.6162216	18.9107435496334
17	28/03/2009	4	7	25.78	2.93	1581.679181	3	4762	184.7168348	13.5910571627081
4	28/03/2009	4	7	30.45	8.45	395.9384615	3	5011	164.5648604	12.8282836108343
13	28/03/2009	4	7	19.2	8.86	390.3442438	3	2346	122.1875	11.0538454847171
5	28/03/2009	4	7	60.21	28.7	639.4456899	3	7265	120.6610198	10.984581002478
10	28/03/2009	4	7	21.18	8.55	1402.694737	3	2177	102.7856468	10.1383256408541
18	28/03/2009	4	7	7.95	0.61	1130	3	471	59.24528302	7.69709575229515
11	28/03/2009	4	7	11.13	0.77	271.6233766	3	426	38.27493261	6.18667379211156
19	28/03/2009	4	7	12.47	1.39	741.2733813	3	291	23.33600642	4.83073559822932
15	28/03/2009	4	7	7.36	0.95	486.3263158	3	150	20.38043478	4.51446949042742
20	28/03/2009	4	7	22.91	2.39	2015.518828	3	286	12.4836316	3.53321830630376
8	28/03/2009	4	7	3.54	0.41	227.3658537	3	32	9.039548023	3.00658411207802
6	28/03/2009	4	7	148.01	6.05	565.2396694	3	1059	7.154921965	2.67486858836093
12	28/03/2009	4	7	13.71	2.26	126.2212389	3	89	6.491611962	2.54786419614547
21	28/03/2009	4	7	6.48	0.01	2485	3	17	2.62345679	1.61970885964114
22	28/03/2009	4	7	1.87	0.04	2485	3	2	1.069518717	1.03417538019429
7	28/03/2009	4	7	25.88	0.94	118.8085106	3	26	1.004636785	1.00231571124072
1	28/03/2009	4	7	10.29	1.1	66.84090909	3	0	0	0
2	28/03/2009	4	7	9.24	0.28	52.71	3	0	0	0
9	28/03/2009	4	7	6.43	0.15	20	3	0	0	0
14	28/03/2009	4	7	25.63	5.97	646.8860972	3	0	0	0
10	25/11/2012	8	16	21.18	8.55	1402.694737	1	15754	743.8149197	27.2729704964457
11	25/11/2012	8	16	11.13	0.77	271.6233766	1	6669	599.1913747	24.4783858679448
5	25/11/2012	8	16	60.21	28.7	639.4456899	1	14427	239.6113602	15.4793850071636
8	25/11/2012	8	16	3.54	0.41	227.3658537	1	713	201.4124294	14.1919846885487
4	25/11/2012	8	16	30.45	8.45	395.9384615	1	3636	119.408867	10.9274364331256
1	25/11/2012	8	16	10.29	1.1	66.84090909	1	441	42.85714286	6.54653670729799
12	25/11/2012	8	16	13.71	2.26	126.2212389	1	530	38.65791393	6.21754886832424
14	25/11/2012	8	16	25.63	5.97	646.8860972	1	819	31.95474054	5.65285242510363
9	25/11/2012	8	16	6.43	0.15	20	1	200	31.10419907	5.57711386561185
6	25/11/2012	8	16	148.01	6.05	565.2396694	1	3473	23.46463077	4.84403042620502
16	25/11/2012	8	16	20.22	8.53	1816.424385	1	393	19.43620178	4.40865078907368
7	25/11/2012	8	16	25.88	0.94	118.8085106	1	375	14.48995363	3.80656717135006
3	25/11/2012	8	16	20.73	12.17	1800	1	177	8.538350217	2.92204555354635
17	25/11/2012	8	16	25.78	2.93	1581.679181	1	68	2.637703646	1.62410087309871
2	25/11/2012	8	16	9.24	0.28	52.71	1	22	2.380952381	1.54303349963635
15	25/11/2012	8	16	7.36	0.95	486.3263158	1	16	2.173913043	1.47441956138679
19	25/11/2012	8	16	12.47	1.39	741.2733813	1	18	1.443464314	1.2014425970474
13	25/11/2012	8	16	19.2	8.86	390.3442438	1	17	0.885416667	0.940965816063474
18	25/11/2012	8	16	7.95	0.61	1130	1	5	0.628930818	0.79305158596399
20	25/11/2012	8	16	22.91	2.39	2015.518828	1	0	0	0
21	25/11/2012	8	16	6.48	0.01	2485	1	0	0	0
22	25/11/2012	8	16	1.87	0.04	2485	1	0	0	0
10	25/11/2011	7	13	21.18	8.55	1402.694737	1	15383	726.2983947	26.9499238347718
11	25/11/2011	7	13	11.13	0.77	271.6233766	1	3824	343.5759209	18.5358010590317
9	25/11/2011	7	13	6.43	0.15	20	1	700	108.8646967	10.4338246439165
8	25/11/2011	7	13	3.54	0.41	227.3658537	1	327	92.37288136	9.61108117539333
5	25/11/2011	7	13	60.21	28.7	639.4456899	1	2639	43.82992858	6.62041755329677
12	25/11/2011	7	13	13.71	2.26	126.2212389	1	589	42.96134209	6.55449022350327
14	25/11/2011	7	13	25.63	5.97	646.8860972	1	880	34.33476395	5.85958735321865
16	25/11/2011	7	13	20.22	8.53	1816.424385	1	447	22.10682493	4.70178954548159
6	25/11/2011	7	13	148.01	6.05	565.2396694	1	2674	18.06634687	4.25045254884701
4	25/11/2011	7	13	30.45	8.45	395.9384615	1	371	12.18390805	3.4905455232671
13	25/11/2011	7	13	19.2	8.86	390.3442438	1	124	6.458333333	2.54132511359724
17	25/11/2011	7	13	25.78	2.93	1581.679181	1	133	5.159038014	2.2713515830888
15	25/11/2011	7	13	7.36	0.95	486.3263158	1	17	2.309782609	1.51979689728595
3	25/11/2011	7	13	20.73	12.17	1800	1	32	1.543656536	1.24243975145679
18	25/11/2011	7	13	7.95	0.61	1130	1	10	1.257861635	1.12154430808595
7	25/11/2011	7	13	25.88	0.94	118.8085106	1	10	0.386398764	0.621609816524804
1	25/11/2011	7	13	10.29	1.1	66.84090909	1	0	0	0
2	25/11/2011	7	13	9.24	0.28	52.71	1	0	0	0
19	25/11/2011	7	13	12.47	1.39	741.2733813	1	0	0	0
20	25/11/2011	7	13	22.91	2.39	2015.518828	1	0	0	0
21	25/11/2011	7	13	6.48	0.01	2485	1	0	0	0
22	25/11/2011	7	13	1.87	0.04	2485	1	0	0	0
3	24/01/2012	7	14	20.73	12.17	1800	2	4856	234.2498794	15.3052239251832
16	24/01/2012	7	14	20.22	8.53	1816.424385	2	4476	221.3649852	14.8783394637977
13	24/01/2012	7	14	19.2	8.86	390.3442438	2	2419	125.9895833	11.2245081540351
17	24/01/2012	7	14	25.78	2.93	1581.679181	2	1330	51.59038014	7.1826443695898
5	24/01/2012	7	14	60.21	28.7	639.4456899	2	2878	47.79936888	6.91370876447656
4	24/01/2012	7	14	30.45	8.45	395.9384615	2	737	24.20361248	4.91971670729118
15	24/01/2012	7	14	7.36	0.95	486.3263158	2	133	18.07065217	4.25095897063239
18	24/01/2012	7	14	7.95	0.61	1130	2	103	12.95597484	3.59944090658535
20	24/01/2012	7	14	22.91	2.39	2015.518828	2	192	8.380619817	2.89493001936144
12	24/01/2012	7	14	13.71	2.26	126.2212389	2	77	5.616338439	2.3698815242539
6	24/01/2012	7	14	148.01	6.05	565.2396694	2	716	4.837510979	2.19943424066281
14	24/01/2012	7	14	25.63	5.97	646.8860972	2	68	2.653140851	1.62884647864678
22	24/01/2012	7	14	1.87	0.04	2485	2	2	1.069518717	1.03417538019429
7	24/01/2012	7	14	25.88	0.94	118.8085106	2	20	0.772797527	0.879089032464858
21	24/01/2012	7	14	6.48	0.01	2485	2	3	0.462962963	0.680413817466988
11	24/01/2012	7	14	11.13	0.77	271.6233766	2	4	0.359389039	0.599490649635172
10	24/01/2012	7	14	21.18	8.55	1402.694737	2	5	0.236071766	0.485872170431689
2	24/01/2012	7	14	9.24	0.28	52.71	2	2	0.216450216	0.465242104715384
1	24/01/2012	7	14	10.29	1.1	66.84090909	2	1	0.09718173	0.311739843459254
8	24/01/2012	7	14	3.54	0.41	227.3658537	2	0	0	0
9	24/01/2012	7	14	6.43	0.15	20	2	0	0	0
19	24/01/2012	7	14	12.47	1.39	741.2733813	2	0	0	0
10	22/11/2008	4	6	21.18	8.55	1402.694737	1	2580	121.8130312	11.0368940920895
16	22/11/2008	4	6	20.22	8.53	1816.424385	1	876	43.32344214	6.58205455310118
5	22/11/2008	4	6	60.21	28.7	639.4456899	1	1911	31.7389138	5.63373000773022
19	22/11/2008	4	6	12.47	1.39	741.2733813	1	388	31.11467522	5.57805299544563
13	22/11/2008	4	6	19.2	8.86	390.3442438	1	498	25.9375	5.09288719686584
11	22/11/2008	4	6	11.13	0.77	271.6233766	1	211	18.95777179	4.35405234121043
20	22/11/2008	4	6	22.91	2.39	2015.518828	1	289	12.61457879	3.55170083058807
8	22/11/2008	4	6	3.54	0.41	227.3658537	1	38	10.73446328	3.2763490778609
12	22/11/2008	4	6	13.71	2.26	126.2212389	1	128	9.336250912	3.05552792688923
3	22/11/2008	4	6	20.73	12.17	1800	1	170	8.20067535	2.86368213145244
4	22/11/2008	4	6	30.45	8.45	395.9384615	1	246	8.078817734	2.84232611323894
6	22/11/2008	4	6	148.01	6.05	565.2396694	1	523	3.533545031	1.8797726008749
17	22/11/2008	4	6	25.78	2.93	1581.679181	1	79	3.064391001	1.75054020262318
15	22/11/2008	4	6	7.36	0.95	486.3263158	1	17	2.309782609	1.51979689728595
21	22/11/2008	4	6	6.48	0.01	2485	1	14	2.160493827	1.46986183942573
14	22/11/2008	4	6	25.63	5.97	646.8860972	1	28	1.092469762	1.04521278312122
22	22/11/2008	4	6	1.87	0.04	2485	1	2	1.069518717	1.03417538019429
18	22/11/2008	4	6	7.95	0.61	1130	1	5	0.628930818	0.79305158596399
7	22/11/2008	4	6	25.88	0.94	118.8085106	1	6	0.231839258	0.481496893032551
1	22/11/2008	4	6	10.29	1.1	66.84090909	1	0	0	0
2	22/11/2008	4	6	9.24	0.28	52.71	1	0	0	0
9	22/11/2008	4	6	6.43	0.15	20	1	0	0	0
3	22/03/2014	9	21	20.73	12.17	1800	3	12704	612.831645	24.7554366756072
13	22/03/2014	9	21	19.2	8.86	390.3442438	3	8501	442.7604167	21.0418729370748
4	22/03/2014	9	21	30.45	8.45	395.9384615	3	5860	192.4466338	13.8725136078506
16	22/03/2014	9	21	20.22	8.53	1816.424385	3	2429	120.1285856	10.9603186814983
7	22/03/2014	9	21	25.88	0.94	118.8085106	3	1951	75.38639876	8.68253412086587
5	22/03/2014	9	21	60.21	28.7	639.4456899	3	3027	50.27404086	7.09041894812993
17	22/03/2014	9	21	25.78	2.93	1581.679181	3	930	36.07447634	6.00620315507226
12	22/03/2014	9	21	13.71	2.26	126.2212389	3	250	18.23486506	4.27023009450311
6	22/03/2014	9	21	148.01	6.05	565.2396694	3	1910	12.90453348	3.59228805637855
14	22/03/2014	9	21	25.63	5.97	646.8860972	3	290	11.31486539	3.36375762949711
8	22/03/2014	9	21	3.54	0.41	227.3658537	3	35	9.88700565	3.14436092871032
9	22/03/2014	9	21	6.43	0.15	20	3	60	9.33125972	3.05471106980677
18	22/03/2014	9	21	7.95	0.61	1130	3	73	9.182389937	3.03024585421711
10	22/03/2014	9	21	21.18	8.55	1402.694737	3	162	7.648725212	2.76563287729952
15	22/03/2014	9	21	7.36	0.95	486.3263158	3	47	6.385869565	2.52702781247061
19	22/03/2014	9	21	12.47	1.39	741.2733813	3	23	1.844426624	1.35809669169761
1	22/03/2014	9	21	10.29	1.1	66.84090909	3	17	1.652089407	1.28533630112901
11	22/03/2014	9	21	11.13	0.77	271.6233766	3	13	1.168014376	1.08074713786343
20	22/03/2014	9	21	22.91	2.39	2015.518828	3	7	0.305543431	0.552759831210626
2	22/03/2014	9	21	9.24	0.28	52.71	3	0	0	0
21	22/03/2014	9	21	6.48	0.01	2485	3	0	0	0
22	22/03/2014	9	21	1.87	0.04	2485	3	0	0	0
10	21/03/2011	6	11	21.18	8.55	1402.694737	3	11223	529.8866856	23.0192677033827
16	21/03/2011	6	11	20.22	8.53	1816.424385	3	9730	481.206726	21.93642464031
11	21/03/2011	6	11	11.13	0.77	271.6233766	3	3730	335.1302785	18.3065638091915
3	21/03/2011	6	11	20.73	12.17	1800	3	6772	326.6763145	18.0741891796008
8	21/03/2011	6	11	3.54	0.41	227.3658537	3	283	79.94350282	8.94111306381929
5	21/03/2011	6	11	60.21	28.7	639.4456899	3	2971	49.3439628	7.02452580605979
12	21/03/2011	6	11	13.71	2.26	126.2212389	3	641	46.75419402	6.83770385582763
17	21/03/2011	6	11	25.78	2.93	1581.679181	3	771	29.90690458	5.46872056152077
15	21/03/2011	6	11	7.36	0.95	486.3263158	3	196	26.63043478	5.16046846516864
4	21/03/2011	6	11	30.45	8.45	395.9384615	3	560	18.3908046	4.28845013961921
6	21/03/2011	6	11	148.01	6.05	565.2396694	3	2196	14.83683535	3.85186128384707
7	21/03/2011	6	11	25.88	0.94	118.8085106	3	313	12.0942813	3.47768332370847
14	21/03/2011	6	11	25.63	5.97	646.8860972	3	190	7.413187671	2.7227169649084
13	21/03/2011	6	11	19.2	8.86	390.3442438	3	133	6.927083333	2.63193528282897
18	21/03/2011	6	11	7.95	0.61	1130	3	51	6.41509434	2.53280365208202
9	21/03/2011	6	11	6.43	0.15	20	3	40	6.220839813	2.49416114415248
1	21/03/2011	6	11	10.29	1.1	66.84090909	3	0	0	0
2	21/03/2011	6	11	9.24	0.28	52.71	3	0	0	0
19	21/03/2011	6	11	12.47	1.39	741.2733813	3	0	0	0
20	21/03/2011	6	11	22.91	2.39	2015.518828	3	0	0	0
21	21/03/2011	6	11	6.48	0.01	2485	3	0	0	0
22	21/03/2011	6	11	1.87	0.04	2485	3	0	0	0
5	17/11/2013	9	19	60.21	28.7	639.4456899	1	57730	958.8108288	30.9646706554421
4	17/11/2013	9	19	30.45	8.45	395.9384615	1	7494	246.1083744	15.6878416106232
16	17/11/2013	9	19	20.22	8.53	1816.424385	1	4926	243.620178	15.60833681082
10	17/11/2013	9	19	21.18	8.55	1402.694737	1	3811	179.9338999	13.4139442335206
3	17/11/2013	9	19	20.73	12.17	1800	1	1308	63.09696093	7.94335954933427
11	17/11/2013	9	19	11.13	0.77	271.6233766	1	651	58.49056604	7.64791252826547
12	17/11/2013	9	19	13.71	2.26	126.2212389	1	648	47.26477024	6.87493783535531
17	17/11/2013	9	19	25.78	2.93	1581.679181	1	1003	38.90612878	6.23747775787618
8	17/11/2013	9	19	3.54	0.41	227.3658537	1	86	24.29378531	4.92887262058982
6	17/11/2013	9	19	148.01	6.05	565.2396694	1	1989	13.4382812	3.66582612790078
15	17/11/2013	9	19	7.36	0.95	486.3263158	1	98	13.31521739	3.64900224582008
18	17/11/2013	9	19	7.95	0.61	1130	1	76	9.559748428	3.09188428438064
7	17/11/2013	9	19	25.88	0.94	118.8085106	1	210	8.114374034	2.84857403519726
14	17/11/2013	9	19	25.63	5.97	646.8860972	1	203	7.920405774	2.81432154772691
13	17/11/2013	9	19	19.2	8.86	390.3442438	1	39	2.03125	1.42521928137392
9	17/11/2013	9	19	6.43	0.15	20	1	8	1.244167963	1.11542277321202
19	17/11/2013	9	19	12.47	1.39	741.2733813	1	4	0.320769848	0.566365472111427
20	17/11/2013	9	19	22.91	2.39	2015.518828	1	2	0.087298123	0.295462557695556
1	17/11/2013	9	19	10.29	1.1	66.84090909	1	0	0	0
2	17/11/2013	9	19	9.24	0.28	52.71	1	0	0	0
21	17/11/2013	9	19	6.48	0.01	2485	1	0	0	0
22	17/11/2013	9	19	1.87	0.04	2485	1	0	0	0
3	17/03/2012	7	15	20.73	12.17	1800	3	6866	331.2108056	18.1991979383708
10	17/03/2012	7	15	21.18	8.55	1402.694737	3	4463	210.7176582	14.5161171874575
5	17/03/2012	7	15	60.21	28.7	639.4456899	3	10558	175.3529314	13.2420893895186
16	17/03/2012	7	15	20.22	8.53	1816.424385	3	2984	147.5766568	12.1481133020729
4	17/03/2012	7	15	30.45	8.45	395.9384615	3	2616	85.91133005	9.26883649925922
8	17/03/2012	7	15	3.54	0.41	227.3658537	3	257	72.59887006	8.5204970547498
12	17/03/2012	7	15	13.71	2.26	126.2212389	3	721	52.58935084	7.25185154563991
11	17/03/2012	7	15	11.13	0.77	271.6233766	3	481	43.2165319	6.57392819401003
17	17/03/2012	7	15	25.78	2.93	1581.679181	3	894	34.678045	5.88880675519243
20	17/03/2012	7	15	22.91	2.39	2015.518828	3	681	29.72501091	5.45206482995204
19	17/03/2012	7	15	12.47	1.39	741.2733813	3	293	23.49639134	4.84730763826683
18	17/03/2012	7	15	7.95	0.61	1130	3	143	17.98742138	4.24115802346482
1	17/03/2012	7	15	10.29	1.1	66.84090909	3	132	12.82798834	3.58161811755525
15	17/03/2012	7	15	7.36	0.95	486.3263158	3	64	8.695652174	2.94883912311269
13	17/03/2012	7	15	19.2	8.86	390.3442438	3	154	8.020833333	2.83210757793556
9	17/03/2012	7	15	6.43	0.15	20	3	50	7.776049767	2.78855693271628
6	17/03/2012	7	15	148.01	6.05	565.2396694	3	1125	7.600837781	2.75696169378539
7	17/03/2012	7	15	25.88	0.94	118.8085106	3	195	7.534775889	2.74495462421513
14	17/03/2012	7	15	25.63	5.97	646.8860972	3	190	7.413187671	2.7227169649084
22	17/03/2012	7	15	1.87	0.04	2485	3	8	4.278074866	2.0683507599051
21	17/03/2012	7	15	6.48	0.01	2485	3	13	2.00617284	1.41639430950565
2	17/03/2012	7	15	9.24	0.28	52.71	3	6	0.649350649	0.805822963807808
10	16/01/2005	3	5	21.18	8.55	1402.694737	2	21780	1028.328612	32.0675632376394
14	16/01/2005	3	5	25.63	5.97	646.8860972	2	15333	598.244245	24.4590319718504
12	16/01/2005	3	5	13.71	2.26	126.2212389	2	6022	439.2414296	20.9580874509102
11	16/01/2005	3	5	11.13	0.77	271.6233766	2	4265	383.1985624	19.5754581657748
8	16/01/2005	3	5	3.54	0.41	227.3658537	2	471	133.0508475	11.5347669027163
13	16/01/2005	3	5	19.2	8.86	390.3442438	2	2435	126.8229167	11.2615681279296
19	16/01/2005	3	5	12.47	1.39	741.2733813	2	969	77.70649559	8.81512879032405
16	16/01/2005	3	5	20.22	8.53	1816.424385	2	773	38.22947577	6.18299893013091
6	16/01/2005	3	5	148.01	6.05	565.2396694	2	4620	31.21410715	5.58695866728939
4	16/01/2005	3	5	30.45	8.45	395.9384615	2	785	25.77996716	5.07739767597536
3	16/01/2005	3	5	20.73	12.17	1800	2	428	20.64640617	4.54383166171459
15	16/01/2005	3	5	7.36	0.95	486.3263158	2	15	2.038043478	1.42760060170904
20	16/01/2005	3	5	22.91	2.39	2015.518828	2	19	0.829332169	0.91067676428028
17	16/01/2005	3	5	25.78	2.93	1581.679181	2	10	0.387897595	0.622814254011579
5	16/01/2005	3	5	60.21	28.7	639.4456899	2	18	0.298953662	0.546766551647044
1	16/01/2005	3	5	10.29	1.1	66.84090909	2	0	0	0
2	16/01/2005	3	5	9.24	0.28	52.71	2	0	0	0
7	16/01/2005	3	5	25.88	0.94	118.8085106	2	0	0	0
9	16/01/2005	3	5	6.43	0.15	20	2	0	0	0
18	16/01/2005	3	5	7.95	0.61	1130	2	0	0	0
21	16/01/2005	3	5	6.48	0.01	2485	2	0	0	0
22	16/01/2005	3	5	1.87	0.04	2485	2	0	0	0
16	15/11/2003	2	2	20.22	8.53	1816.424385	1	3875	191.6419387	13.843480006848
10	15/11/2003	2	2	21.18	8.55	1402.694737	1	2420	114.2587347	10.689187747439
14	15/11/2003	2	2	25.63	5.97	646.8860972	1	2108	82.24736637	9.06903337572423
11	15/11/2003	2	2	11.13	0.77	271.6233766	1	363	32.61455526	5.71091544850736
8	15/11/2003	2	2	3.54	0.41	227.3658537	1	65	18.36158192	4.28504164740554
12	15/11/2003	2	2	13.71	2.26	126.2212389	1	177	12.91028446	3.59308842919291
15	15/11/2003	2	2	7.36	0.95	486.3263158	1	79	10.73369565	3.27623192860335
17	15/11/2003	2	2	25.78	2.93	1581.679181	1	143	5.546935609	2.35519332730882
6	15/11/2003	2	2	148.01	6.05	565.2396694	1	382	2.580906695	1.60652005745338
13	15/11/2003	2	2	19.2	8.86	390.3442438	1	41	2.135416667	1.46130649317657
18	15/11/2003	2	2	7.95	0.61	1130	1	7	0.880503145	0.93835129082876
1	15/11/2003	2	2	10.29	1.1	66.84090909	1	0	0	0
2	15/11/2003	2	2	9.24	0.28	52.71	1	0	0	0
3	15/11/2003	2	2	20.73	12.17	1800	1	0	0	0
4	15/11/2003	2	2	30.45	8.45	395.9384615	1	0	0	0
5	15/11/2003	2	2	60.21	28.7	639.4456899	1	0	0	0
7	15/11/2003	2	2	25.88	0.94	118.8085106	1	0	0	0
9	15/11/2003	2	2	6.43	0.15	20	1	0	0	0
19	15/11/2003	2	2	12.47	1.39	741.2733813	1	0	0	0
20	15/11/2003	2	2	22.91	2.39	2015.518828	1	0	0	0
21	15/11/2003	2	2	6.48	0.01	2485	1	0	0	0
22	15/11/2003	2	2	1.87	0.04	2485	1	0	0	0
14	15/11/2002	1	1	25.63	5.97	646.8860972	1	6133	239.2898947	15.4689978570042
3	15/11/2002	1	1	20.73	12.17	1800	1	4454	214.8576942	14.658024907879
16	15/11/2002	1	1	20.22	8.53	1816.424385	1	3093	152.9673591	12.3679973762934
10	15/11/2002	1	1	21.18	8.55	1402.694737	1	645	30.45325779	5.5184470451387
5	15/11/2002	1	1	60.21	28.7	639.4456899	1	1434	23.81664175	4.88022968209489
12	15/11/2002	1	1	13.71	2.26	126.2212389	1	145	10.57622174	3.25211035175623
15	15/11/2002	1	1	7.36	0.95	486.3263158	1	63	8.559782609	2.92571061607262
13	15/11/2002	1	1	19.2	8.86	390.3442438	1	121	6.302083333	2.51039505516562
11	15/11/2002	1	1	11.13	0.77	271.6233766	1	54	4.851752022	2.20266929474218
2	15/11/2002	1	1	9.24	0.28	52.71	1	36	3.896103896	1.97385508485299
4	15/11/2002	1	1	30.45	8.45	395.9384615	1	83	2.725779967	1.65099363021182
8	15/11/2002	1	1	3.54	0.41	227.3658537	1	9	2.542372881	1.59448201024659
17	15/11/2002	1	1	25.78	2.93	1581.679181	1	43	1.667959659	1.29149512542634
1	15/11/2002	1	1	10.29	1.1	66.84090909	1	14	1.360544218	1.16642368717375
6	15/11/2002	1	1	148.01	6.05	565.2396694	1	119	0.80399973	0.896660320299722
7	15/11/2002	1	1	25.88	0.94	118.8085106	1	5	0.193199382	0.439544516516814
9	15/11/2002	1	1	6.43	0.15	20	1	0	0	0
18	15/11/2002	1	1	7.95	0.61	1130	1	0	0	0
19	15/11/2002	1	1	12.47	1.39	741.2733813	1	0	0	0
20	15/11/2002	1	1	22.91	2.39	2015.518828	1	0	0	0
21	15/11/2002	1	1	6.48	0.01	2485	1	0	0	0
22	15/11/2002	1	1	1.87	0.04	2485	1	0	0	0
16	14/11/2010	6	10	20.22	8.53	1816.424385	1	1034	51.13748764	7.15104800990736
18	14/11/2010	6	10	7.95	0.61	1130	1	356	44.77987421	6.69177661088593
17	14/11/2010	6	10	25.78	2.93	1581.679181	1	719	27.88983708	5.28108294576027
14	14/11/2010	6	10	25.63	5.97	646.8860972	1	479	18.68903629	4.32308180468517
13	14/11/2010	6	10	19.2	8.86	390.3442438	1	293	15.26041667	3.90645832820472
3	14/11/2010	6	10	20.73	12.17	1800	1	93	4.486251809	2.11807738503578
15	14/11/2010	6	10	7.36	0.95	486.3263158	1	19	2.581521739	1.60671146725229
12	14/11/2010	6	10	13.71	2.26	126.2212389	1	19	1.385849745	1.17722119629235
10	14/11/2010	6	10	21.18	8.55	1402.694737	1	16	0.755429651	0.869154561053441
4	14/11/2010	6	10	30.45	8.45	395.9384615	1	17	0.558292282	0.747189589060233
6	14/11/2010	6	10	148.01	6.05	565.2396694	1	58	0.391865414	0.625991544671332
2	14/11/2010	6	10	9.24	0.28	52.71	1	1	0.108225108	0.32897584713775
11	14/11/2010	6	10	11.13	0.77	271.6233766	1	1	0.08984726	0.299745325234606
1	14/11/2010	6	10	10.29	1.1	66.84090909	1	0	0	0
5	14/11/2010	6	10	60.21	28.7	639.4456899	1	0	0	0
7	14/11/2010	6	10	25.88	0.94	118.8085106	1	0	0	0
8	14/11/2010	6	10	3.54	0.41	227.3658537	1	0	0	0
9	14/11/2010	6	10	6.43	0.15	20	1	0	0	0
19	14/11/2010	6	10	12.47	1.39	741.2733813	1	0	0	0
20	14/11/2010	6	10	22.91	2.39	2015.518828	1	0	0	0
21	14/11/2010	6	10	6.48	0.01	2485	1	0	0	0
22	14/11/2010	6	10	1.87	0.04	2485	1	0	0	0
10	14/11/2009	5	8	21.18	8.55	1402.694737	1	7257	342.6345609	18.5103906198654
12	14/11/2009	5	8	13.71	2.26	126.2212389	1	886	64.62436178	8.03892789991302
11	14/11/2009	5	8	11.13	0.77	271.6233766	1	595	53.4591195	7.3115743516701
5	14/11/2009	5	8	60.21	28.7	639.4456899	1	2488	41.32203953	6.42822211268404
8	14/11/2009	5	8	3.54	0.41	227.3658537	1	109	30.79096045	5.54896030351633
3	14/11/2009	5	8	20.73	12.17	1800	1	568	27.39990352	5.23449171553457
16	14/11/2009	5	8	20.22	8.53	1816.424385	1	386	19.09000989	4.36921158677398
13	14/11/2009	5	8	19.2	8.86	390.3442438	1	355	18.48958333	4.29995154972704
4	14/11/2009	5	8	30.45	8.45	395.9384615	1	442	14.51559934	3.80993429602139
6	14/11/2009	5	8	148.01	6.05	565.2396694	1	1287	8.695358422	2.9487893146171
15	14/11/2009	5	8	7.36	0.95	486.3263158	1	7	0.951086957	0.97523687225207
1	14/11/2009	5	8	10.29	1.1	66.84090909	1	8	0.777453839	0.881733428537219
7	14/11/2009	5	8	25.88	0.94	118.8085106	1	9	0.347758887	0.589710850332602
17	14/11/2009	5	8	25.78	2.93	1581.679181	1	5	0.193948798	0.440396182998899
2	14/11/2009	5	8	9.24	0.28	52.71	1	0	0	0
9	14/11/2009	5	8	6.43	0.15	20	1	0	0	0
14	14/11/2009	5	8	25.63	5.97	646.8860972	1	0	0	0
18	14/11/2009	5	8	7.95	0.61	1130	1	0	0	0
19	14/11/2009	5	8	12.47	1.39	741.2733813	1	0	0	0
20	14/11/2009	5	8	22.91	2.39	2015.518828	1	0	0	0
21	14/11/2009	5	8	6.48	0.01	2485	1	0	0	0
22	14/11/2009	5	8	1.87	0.04	2485	1	0	0	0
3	14/11/2004	3	4	20.73	12.17	1800	1	5445	262.6628075	16.2068753157418
4	14/11/2004	3	4	30.45	8.45	395.9384615	1	3928	128.998358	11.3577444063511
16	14/11/2004	3	4	20.22	8.53	1816.424385	1	1496	73.98615232	8.6015203493336
5	14/11/2004	3	4	60.21	28.7	639.4456899	1	2958	49.12805182	7.00914059068585
18	14/11/2004	3	4	7.95	0.61	1130	1	273	34.33962264	5.8600019317403
7	14/11/2004	3	4	25.88	0.94	118.8085106	1	107	4.13446677	2.03333882321663
15	14/11/2004	3	4	7.36	0.95	486.3263158	1	30	4.076086957	2.01893213283656
17	14/11/2004	3	4	25.78	2.93	1581.679181	1	47	1.823118697	1.35022912759279
8	14/11/2004	3	4	3.54	0.41	227.3658537	1	6	1.694915254	1.30188910971711
10	14/11/2004	3	4	21.18	8.55	1402.694737	1	35	1.652502361	1.28549693154048
6	14/11/2004	3	4	148.01	6.05	565.2396694	1	165	1.114789541	1.05583594416936
14	14/11/2004	3	4	25.63	5.97	646.8860972	1	10	0.390167772	0.624634110499899
2	14/11/2004	3	4	9.24	0.28	52.71	1	3	0.324675325	0.569802882583091
11	14/11/2004	3	4	11.13	0.77	271.6233766	1	2	0.179694519	0.423903903025202
13	14/11/2004	3	4	19.2	8.86	390.3442438	1	1	0.052083333	0.228217731563522
1	14/11/2004	3	4	10.29	1.1	66.84090909	1	0	0	0
9	14/11/2004	3	4	6.43	0.15	20	1	0	0	0
12	14/11/2004	3	4	13.71	2.26	126.2212389	1	0	0	0
19	14/11/2004	3	4	12.47	1.39	741.2733813	1	0	0	0
20	14/11/2004	3	4	22.91	2.39	2015.518828	1	0	0	0
21	14/11/2004	3	4	6.48	0.01	2485	1	0	0	0
22	14/11/2004	3	4	1.87	0.04	2485	1	0	0	0
10	13/01/2013	8	17	21.18	8.55	1402.694737	2	1370	64.68366383	8.04261548440556
16	13/01/2013	8	17	20.22	8.53	1816.424385	2	587	29.03066271	5.38801101613573
11	13/01/2013	8	17	11.13	0.77	271.6233766	2	112	10.06289308	3.17220634259501
8	13/01/2013	8	17	3.54	0.41	227.3658537	2	20	5.649717514	2.3769134426815
19	13/01/2013	8	17	12.47	1.39	741.2733813	2	68	5.45308741	2.33518466293353
20	13/01/2013	8	17	22.91	2.39	2015.518828	2	100	4.364906155	2.0892357825291
12	13/01/2013	8	17	13.71	2.26	126.2212389	2	50	3.646973012	1.90970495417486
15	13/01/2013	8	17	7.36	0.95	486.3263158	2	11	1.494565217	1.22252411714452
6	13/01/2013	8	17	148.01	6.05	565.2396694	2	203	1.371528951	1.17112294444264
22	13/01/2013	8	17	1.87	0.04	2485	2	1	0.534759358	0.731272423929687
17	13/01/2013	8	17	25.78	2.93	1581.679181	2	8	0.310318076	0.557062003730285
21	13/01/2013	8	17	6.48	0.01	2485	2	1	0.154320988	0.392837101099171
1	13/01/2013	8	17	10.29	1.1	66.84090909	2	0	0	0
2	13/01/2013	8	17	9.24	0.28	52.71	2	0	0	0
3	13/01/2013	8	17	20.73	12.17	1800	2	0	0	0
4	13/01/2013	8	17	30.45	8.45	395.9384615	2	0	0	0
5	13/01/2013	8	17	60.21	28.7	639.4456899	2	0	0	0
7	13/01/2013	8	17	25.88	0.94	118.8085106	2	0	0	0
9	13/01/2013	8	17	6.43	0.15	20	2	0	0	0
13	13/01/2013	8	17	19.2	8.86	390.3442438	2	0	0	0
14	13/01/2013	8	17	25.63	5.97	646.8860972	2	0	0	0
18	13/01/2013	8	17	7.95	0.61	1130	2	0	0	0
3	12/03/2004	2	3	20.73	12.17	1800	3	6710	323.68548	17.991261212044
4	12/03/2004	2	3	30.45	8.45	395.9384615	3	3972	130.4433498	11.4211798777534
16	12/03/2004	2	3	20.22	8.53	1816.424385	3	1496	73.98615232	8.6015203493336
13	12/03/2004	2	3	19.2	8.86	390.3442438	3	1139	59.32291667	7.70213714951896
5	12/03/2004	2	3	60.21	28.7	639.4456899	3	2958	49.12805182	7.00914059068585
18	12/03/2004	2	3	7.95	0.61	1130	3	273	34.33962264	5.8600019317403
7	12/03/2004	2	3	25.88	0.94	118.8085106	3	107	4.13446677	2.03333882321663
15	12/03/2004	2	3	7.36	0.95	486.3263158	3	30	4.076086957	2.01893213283656
6	12/03/2004	2	3	148.01	6.05	565.2396694	3	386	2.607931896	1.61490925317802
12	12/03/2004	2	3	13.71	2.26	126.2212389	3	32	2.334062728	1.52776396344462
17	12/03/2004	2	3	25.78	2.93	1581.679181	3	47	1.823118697	1.35022912759279
8	12/03/2004	2	3	3.54	0.41	227.3658537	3	6	1.694915254	1.30188910971711
10	12/03/2004	2	3	21.18	8.55	1402.694737	3	35	1.652502361	1.28549693154048
14	12/03/2004	2	3	25.63	5.97	646.8860972	3	10	0.390167772	0.624634110499899
2	12/03/2004	2	3	9.24	0.28	52.71	3	3	0.324675325	0.569802882583091
11	12/03/2004	2	3	11.13	0.77	271.6233766	3	2	0.179694519	0.423903903025202
1	12/03/2004	2	3	10.29	1.1	66.84090909	3	0	0	0
9	12/03/2004	2	3	6.43	0.15	20	3	0	0	0
19	12/03/2004	2	3	12.47	1.39	741.2733813	3	0	0	0
20	12/03/2004	2	3	22.91	2.39	2015.518828	3	0	0	0
21	12/03/2004	2	3	6.48	0.01	2485	3	0	0	0
22	12/03/2004	2	3	1.87	0.04	2485	3	0	0	0
3	12/01/2014	9	20	20.73	12.17	1800	2	20786	1002.701399	31.665460663
16	12/01/2014	9	20	20.22	8.53	1816.424385	2	5800	286.8447082	16.9364904333808
8	12/01/2014	9	20	3.54	0.41	227.3658537	2	699	197.4576271	14.0519616815589
14	12/01/2014	9	20	25.63	5.97	646.8860972	2	3469	135.3492002	11.6339675175754
10	12/01/2014	9	20	21.18	8.55	1402.694737	2	2153	101.6525024	10.0822865660524
9	12/01/2014	9	20	6.43	0.15	20	2	600	93.3125972	9.65984457431899
15	12/01/2014	9	20	7.36	0.95	486.3263158	2	117	15.89673913	3.98707149797944
11	12/01/2014	9	20	11.13	0.77	271.6233766	2	173	15.54357592	3.94253420023213
12	12/01/2014	9	20	13.71	2.26	126.2212389	2	196	14.29613421	3.78102290524667
4	12/01/2014	9	20	30.45	8.45	395.9384615	2	213	6.995073892	2.64482020031608
13	12/01/2014	9	20	19.2	8.86	390.3442438	2	68	3.541666667	1.88193163186126
17	12/01/2014	9	20	25.78	2.93	1581.679181	2	81	3.14197052	1.77256044184677
6	12/01/2014	9	20	148.01	6.05	565.2396694	2	319	2.15525978	1.46808030434306
1	12/01/2014	9	20	10.29	1.1	66.84090909	2	0	0	0
2	12/01/2014	9	20	9.24	0.28	52.71	2	0	0	0
5	12/01/2014	9	20	60.21	28.7	639.4456899	2	0	0	0
7	12/01/2014	9	20	25.88	0.94	118.8085106	2	0	0	0
18	12/01/2014	9	20	7.95	0.61	1130	2	0	0	0
19	12/01/2014	9	20	12.47	1.39	741.2733813	2	0	0	0
20	12/01/2014	9	20	22.91	2.39	2015.518828	2	0	0	0
21	12/01/2014	9	20	6.48	0.01	2485	2	0	0	0
22	12/01/2014	9	20	1.87	0.04	2485	2	0	0	0
3	10/04/2011	6	12	20.73	12.17	1800	3	40018	1930.438977	43.9367611118526
4	10/04/2011	6	12	30.45	8.45	395.9384615	3	39177	1286.600985	35.8692205797673
16	10/04/2011	6	12	20.22	8.53	1816.424385	3	7020	347.1810089	18.6327939102004
13	10/04/2011	6	12	19.2	8.86	390.3442438	3	3764	196.0416667	14.0014880173502
17	10/04/2011	6	12	25.78	2.93	1581.679181	3	2665	103.3747091	10.167335398225
10	10/04/2011	6	12	21.18	8.55	1402.694737	3	2058	97.16713881	9.85733933726541
5	10/04/2011	6	12	60.21	28.7	639.4456899	3	5340	88.68958645	9.41751487654785
18	10/04/2011	6	12	7.95	0.61	1130	3	526	66.16352201	8.13409626264651
12	10/04/2011	6	12	13.71	2.26	126.2212389	3	777	56.67396061	7.52821098336119
11	10/04/2011	6	12	11.13	0.77	271.6233766	3	505	45.37286613	6.73593840010432
6	10/04/2011	6	12	148.01	6.05	565.2396694	3	3599	24.3159246	4.93111798682611
15	10/04/2011	6	12	7.36	0.95	486.3263158	3	137	18.61413043	4.31440962705212
8	10/04/2011	6	12	3.54	0.41	227.3658537	3	30	8.474576271	2.91111254866589
14	10/04/2011	6	12	25.63	5.97	646.8860972	3	47	1.833788529	1.35417448248001
7	10/04/2011	6	12	25.88	0.94	118.8085106	3	41	1.58423493	1.25866394641302
20	10/04/2011	6	12	22.91	2.39	2015.518828	3	19	0.829332169	0.91067676428028
1	10/04/2011	6	12	10.29	1.1	66.84090909	3	0	0	0
2	10/04/2011	6	12	9.24	0.28	52.71	3	0	0	0
9	10/04/2011	6	12	6.43	0.15	20	3	0	0	0
19	10/04/2011	6	12	12.47	1.39	741.2733813	3	0	0	0
21	10/04/2011	6	12	6.48	0.01	2485	3	0	0	0
22	10/04/2011	6	12	1.87	0.04	2485	3	0	0	0
10	07/04/2013	8	18	21.18	8.55	1402.694737	3	12097	571.1520302	23.8987872119068
3	07/04/2013	8	18	20.73	12.17	1800	3	5612	270.7187651	16.4535335141118
12	07/04/2013	8	18	13.71	2.26	126.2212389	3	1790	130.5616338	11.4263569784949
11	07/04/2013	8	18	11.13	0.77	271.6233766	3	1055	94.78885894	9.73595701202506
5	07/04/2013	8	18	60.21	28.7	639.4456899	3	3371	55.98737751	7.48247135042962
16	07/04/2013	8	18	20.22	8.53	1816.424385	3	1068	52.8189911	7.26766751440928
8	07/04/2013	8	18	3.54	0.41	227.3658537	3	182	51.41242938	7.17024611711481
4	07/04/2013	8	18	30.45	8.45	395.9384615	3	1527	50.14778325	7.0815099555109
13	07/04/2013	8	18	19.2	8.86	390.3442438	3	929	48.38541667	6.95596267025636
6	07/04/2013	8	18	148.01	6.05	565.2396694	3	2291	15.47868387	3.93429585440648
14	07/04/2013	8	18	25.63	5.97	646.8860972	3	239	9.325009754	3.0536878940062
20	07/04/2013	8	18	22.91	2.39	2015.518828	3	156	6.809253601	2.60945465586203
15	07/04/2013	8	18	7.36	0.95	486.3263158	3	25	3.39673913	1.84302445181826
17	07/04/2013	8	18	25.78	2.93	1581.679181	3	67	2.598913887	1.6121147251359
22	07/04/2013	8	18	1.87	0.04	2485	3	2	1.069518717	1.03417538019429
18	07/04/2013	8	18	7.95	0.61	1130	3	4	0.503144654	0.709326902069843
7	07/04/2013	8	18	25.88	0.94	118.8085106	3	12	0.463678516	0.680939436367141
21	07/04/2013	8	18	6.48	0.01	2485	3	3	0.462962963	0.680413817466988
1	07/04/2013	8	18	10.29	1.1	66.84090909	3	0	0	0
2	07/04/2013	8	18	9.24	0.28	52.71	3	0	0	0
9	07/04/2013	8	18	6.43	0.15	20	3	0	0	0
19	07/04/2013	8	18	12.47	1.39	741.2733813	3	0	0	0
4	04/04/2014	9	22	30.45	8.45	395.9384615	3	5634	185.0246305	13.602375913788
16	04/04/2014	9	22	20.22	8.53	1816.424385	3	3304	163.4025717	12.7829015368186
13	04/04/2014	9	22	19.2	8.86	390.3442438	3	2873	149.6354167	12.2325556078851
17	04/04/2014	9	22	25.78	2.93	1581.679181	3	2159	83.74709077	9.15134365926665
5	04/04/2014	9	22	60.21	28.7	639.4456899	3	4905	81.46487294	9.02578932503967
14	04/04/2014	9	22	25.63	5.97	646.8860972	3	1533	59.81271947	7.7338683380311
3	04/04/2014	9	22	20.73	12.17	1800	3	724	34.92522914	5.90975711345229
12	04/04/2014	9	22	13.71	2.26	126.2212389	3	468	34.1356674	5.8425736965827
18	04/04/2014	9	22	7.95	0.61	1130	3	172	21.63522013	4.65136755481654
20	04/04/2014	9	22	22.91	2.39	2015.518828	3	241	10.51942383	3.24336612641866
15	04/04/2014	9	22	7.36	0.95	486.3263158	3	62	8.423913043	2.90239780922602
6	04/04/2014	9	22	148.01	6.05	565.2396694	3	842	5.68880481	2.38512155036174
22	04/04/2014	9	22	1.87	0.04	2485	3	2	1.069518717	1.03417538019429
7	04/04/2014	9	22	25.88	0.94	118.8085106	3	17	0.656877898	0.810480041703681
21	04/04/2014	9	22	6.48	0.01	2485	3	4	0.617283951	0.785674201561945
1	04/04/2014	9	22	10.29	1.1	66.84090909	3	0	0	0
2	04/04/2014	9	22	9.24	0.28	52.71	3	0	0	0
8	04/04/2014	9	22	3.54	0.41	227.3658537	3	0	0	0
9	04/04/2014	9	22	6.43	0.15	20	3	0	0	0
10	04/04/2014	9	22	21.18	8.55	1402.694737	3	0	0	0
11	04/04/2014	9	22	11.13	0.77	271.6233766	3	0	0	0
19	04/04/2014	9	22	12.47	1.39	741.2733813	3	0	0	0
3	02/04/2010	5	9	20.73	12.17	1800	3	4949	238.7361312	15.451088350016
12	02/04/2010	5	9	13.71	2.26	126.2212389	3	715	52.15171408	7.2216143679928
5	02/04/2010	5	9	60.21	28.7	639.4456899	3	1906	31.65587112	5.62635504745301
10	02/04/2010	5	9	21.18	8.55	1402.694737	3	637	30.07554297	5.48411733736615
16	02/04/2010	5	9	20.22	8.53	1816.424385	3	483	23.88724036	4.88745745352325
11	02/04/2010	5	9	11.13	0.77	271.6233766	3	217	19.49685535	4.41552435731024
4	02/04/2010	5	9	30.45	8.45	395.9384615	3	101	3.316912972	1.82123940545992
8	02/04/2010	5	9	3.54	0.41	227.3658537	3	9	2.542372881	1.59448201024659
6	02/04/2010	5	9	148.01	6.05	565.2396694	3	256	1.729612864	1.31514746853727
15	02/04/2010	5	9	7.36	0.95	486.3263158	3	9	1.222826087	1.10581467118139
7	02/04/2010	5	9	25.88	0.94	118.8085106	3	7	0.270479134	0.520076084818366
17	02/04/2010	5	9	25.78	2.93	1581.679181	3	6	0.232738557	0.482429846713488
1	02/04/2010	5	9	10.29	1.1	66.84090909	3	0	0	0
2	02/04/2010	5	9	9.24	0.28	52.71	3	0	0	0
9	02/04/2010	5	9	6.43	0.15	20	3	0	0	0
13	02/04/2010	5	9	19.2	8.86	390.3442438	3	0	0	0
14	02/04/2010	5	9	25.63	5.97	646.8860972	3	0	0	0
18	02/04/2010	5	9	7.95	0.61	1130	3	0	0	0
19	02/04/2010	5	9	12.47	1.39	741.2733813	3	0	0	0
20	02/04/2010	5	9	22.91	2.39	2015.518828	3	0	0	0
21	02/04/2010	5	9	6.48	0.01	2485	3	0	0	0
22	02/04/2010	5	9	1.87	0.04	2485	3	0	0	0
